# Supplementary material for: Persister Cells Resuscitate Using Membrane Sensors that Activate Chemotaxis, Lower cAMP Levels, and Revive Ribosomes
Source: PubMed Central journal article supplement — iScience. 2019 Dec 21;23(1):100792. doi: 10.1016/j.isci.2019.100792 (PMC6957856; doi:10.1016/j.isci.2019.100792), 2019-12-21
Supplement: mmc1.pdf [file mmc1.pdf]

**ISCI, Volume 23**

**Supplemental Information**

**Persister Cells Resuscitate Using  
Membrane Sensors that Activate Chemotaxis, Lower  
cAMP Levels, and Revive Ribosomes**

**Ryota Yamasaki, Sooyeon Song, Michael J. Benedik, and Thomas K. Wood**

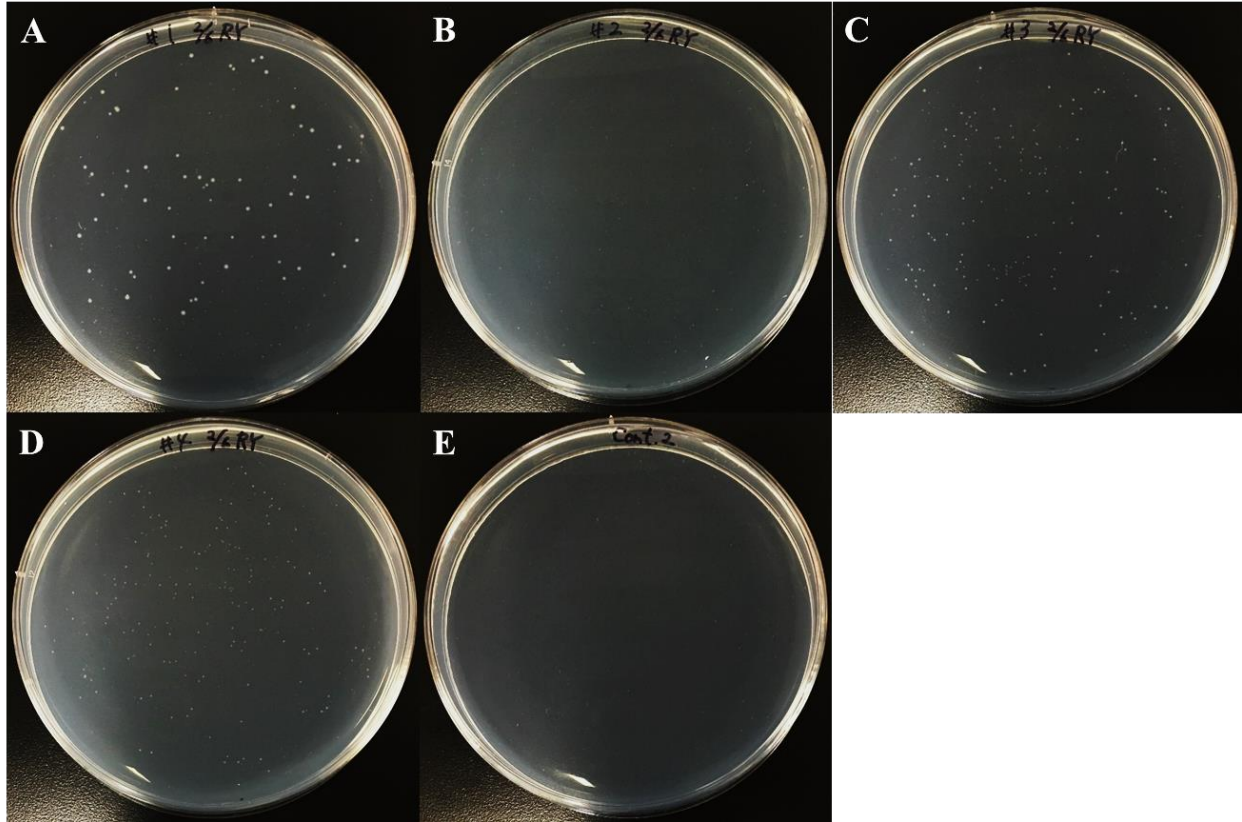

**Supplementary Figure 1. Persister cells waking on agar plates with groups of amino acids, Related to Figure 1.** *E. coli* BW25113 persister cells were incubated at 37 °C for 4 days on M9 agar plates with groups of five different amino acids: **(A) #1:** Arg, Ser, Cys, Ala, and Phe, **(B) #2:** His, Thr, Gly, Val, and Tyr, **(C) #3:** Lys, Asn, Pro, Ile, and Trp, **(D) #4:** Asp, Glu, Gln, Leu, and Met, and **(E)** no amino acids. These amino acids were used at 1X concentration (**Table S14**). One representative plate of two independent cultures is shown.

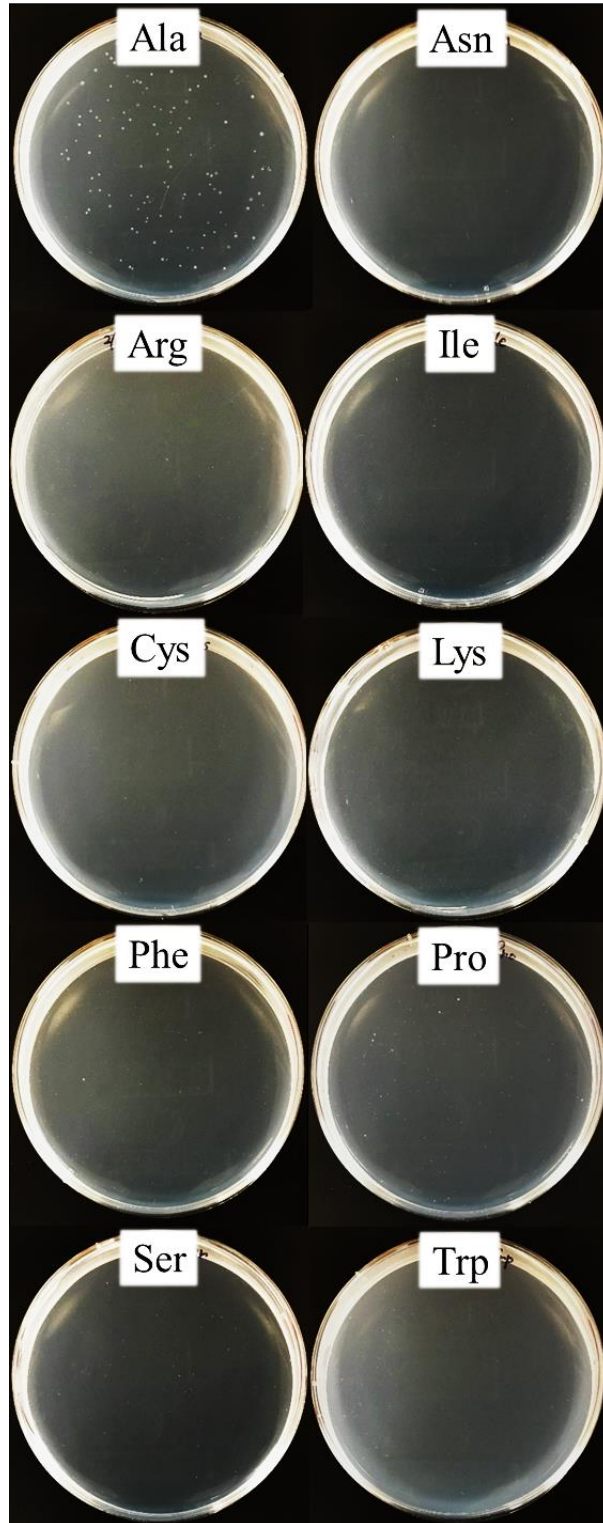

**Supplementary Figure 2. Persister cells waking on agar plates with alanine, Related to Figure 1.** *E. coli* BW25113 persister cells were incubated at 37 °C for 4 days on M9 agar plates with 10 different amino acids (Arg, Ser, Cys, Ala, Phe, Lys, Asn, Pro, Ile, and Trp). These amino acids were used at 1X concentration (Table S14). One representative plate of two independent cultures is shown.

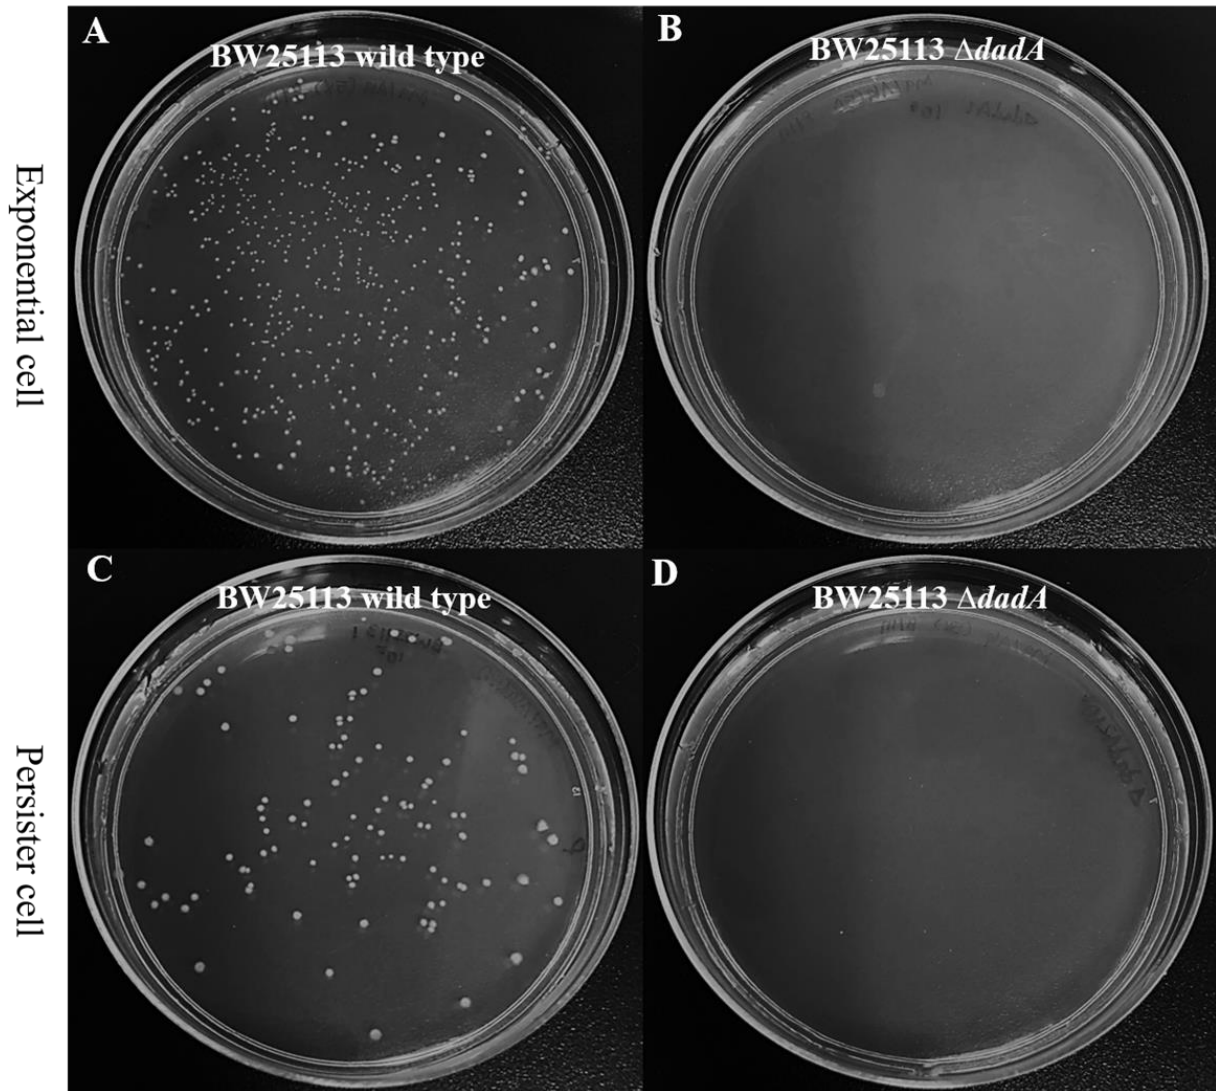

**Supplementary Figure 3. Alanine is a waking signal, Related to Figure 2.** Exponential wild-type *E. coli* BW25113 (A), exponential BW25113  $\Delta dadA$  (B), persister wild-type *E. coli* BW25113 (C), and persister BW25113  $\Delta dadA$  (D) incubated at 37 °C on M9 5X Ala agar plates for 3 days.

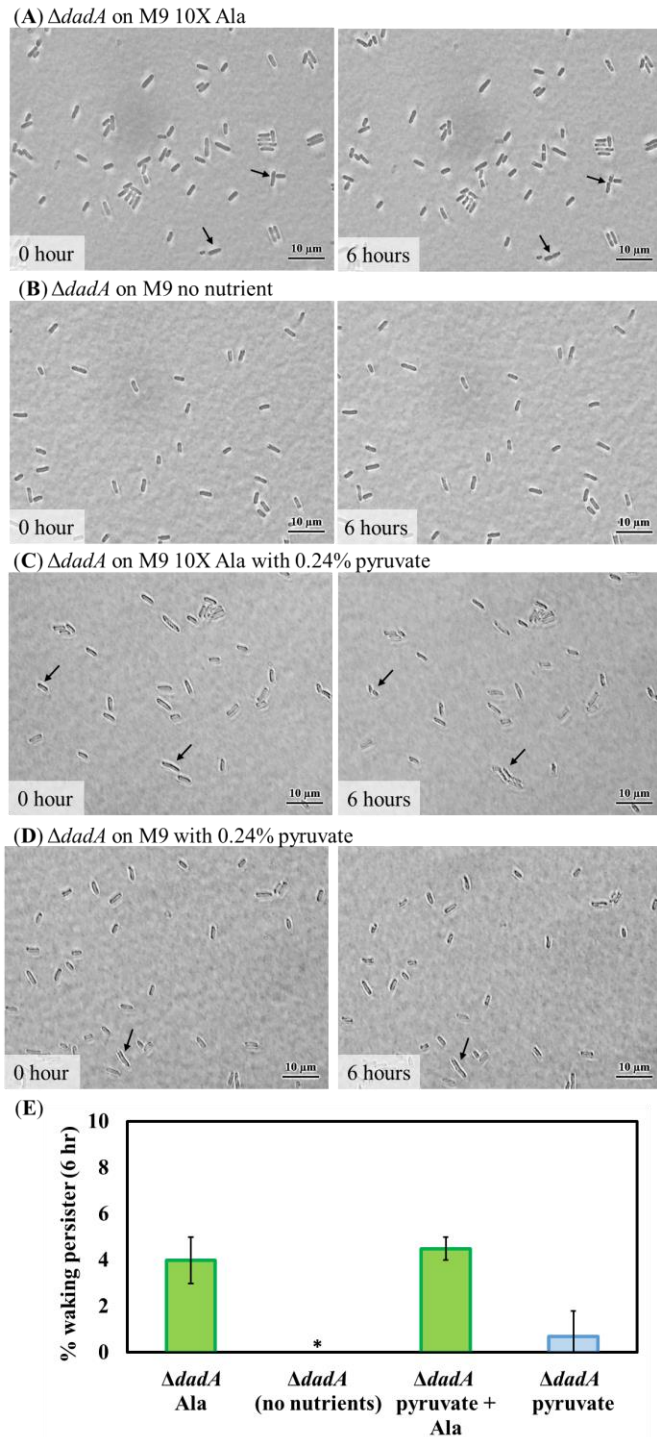

**Supplementary Figure 4. Alanine is a waking signal, Related to Figure 2.** Persister cells of BW25113  $\Delta dadA$  on M9 10X Ala gel pads (A), on M9 no nutrient gel pads (B), on M9 10X Ala with 0.24% pyruvate (C), and on M9 with 0.24% pyruvate (D) after 6 h at 37°C. Black arrows indicate cells that resuscitate. Scale bar indicates 10  $\mu$ m. One representative plate of two independent cultures is shown. (E)  $dada$  persister cell waking (%) after 6 hours. Tabulated cell numbers are shown in **Supplementary Table 3**. Error bars indicate standard deviations. Student's t-test was used to compare  $\Delta dadA$  + Ala and  $\Delta dadA$  (no nutrients) (\* indicates a p value < 0.05).

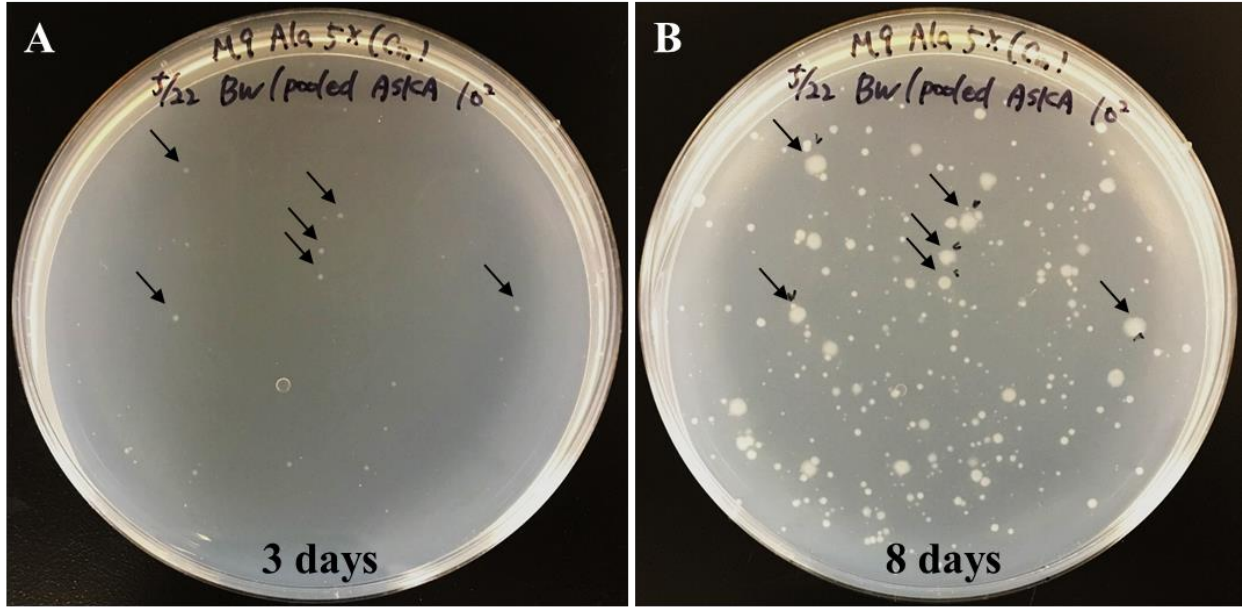

**Supplementary Figure 5. Screening persister cell waking with the pooled ASKA plasmids on Ala, Related to Figure 3.** *E. coli* BW25113 persisters containing each of the pooled ASKA plasmids were incubated at 37 °C on M9 5X Ala agar plates with 30 µg/mL Cm for (A) 3 days and (B) 8 days. Faster growing colonies are indicated with black arrows. Prior to forming persister cells, cultures were grown without IPTG with 30 µg/mL Cm. One representative plate of two independent cultures is shown.



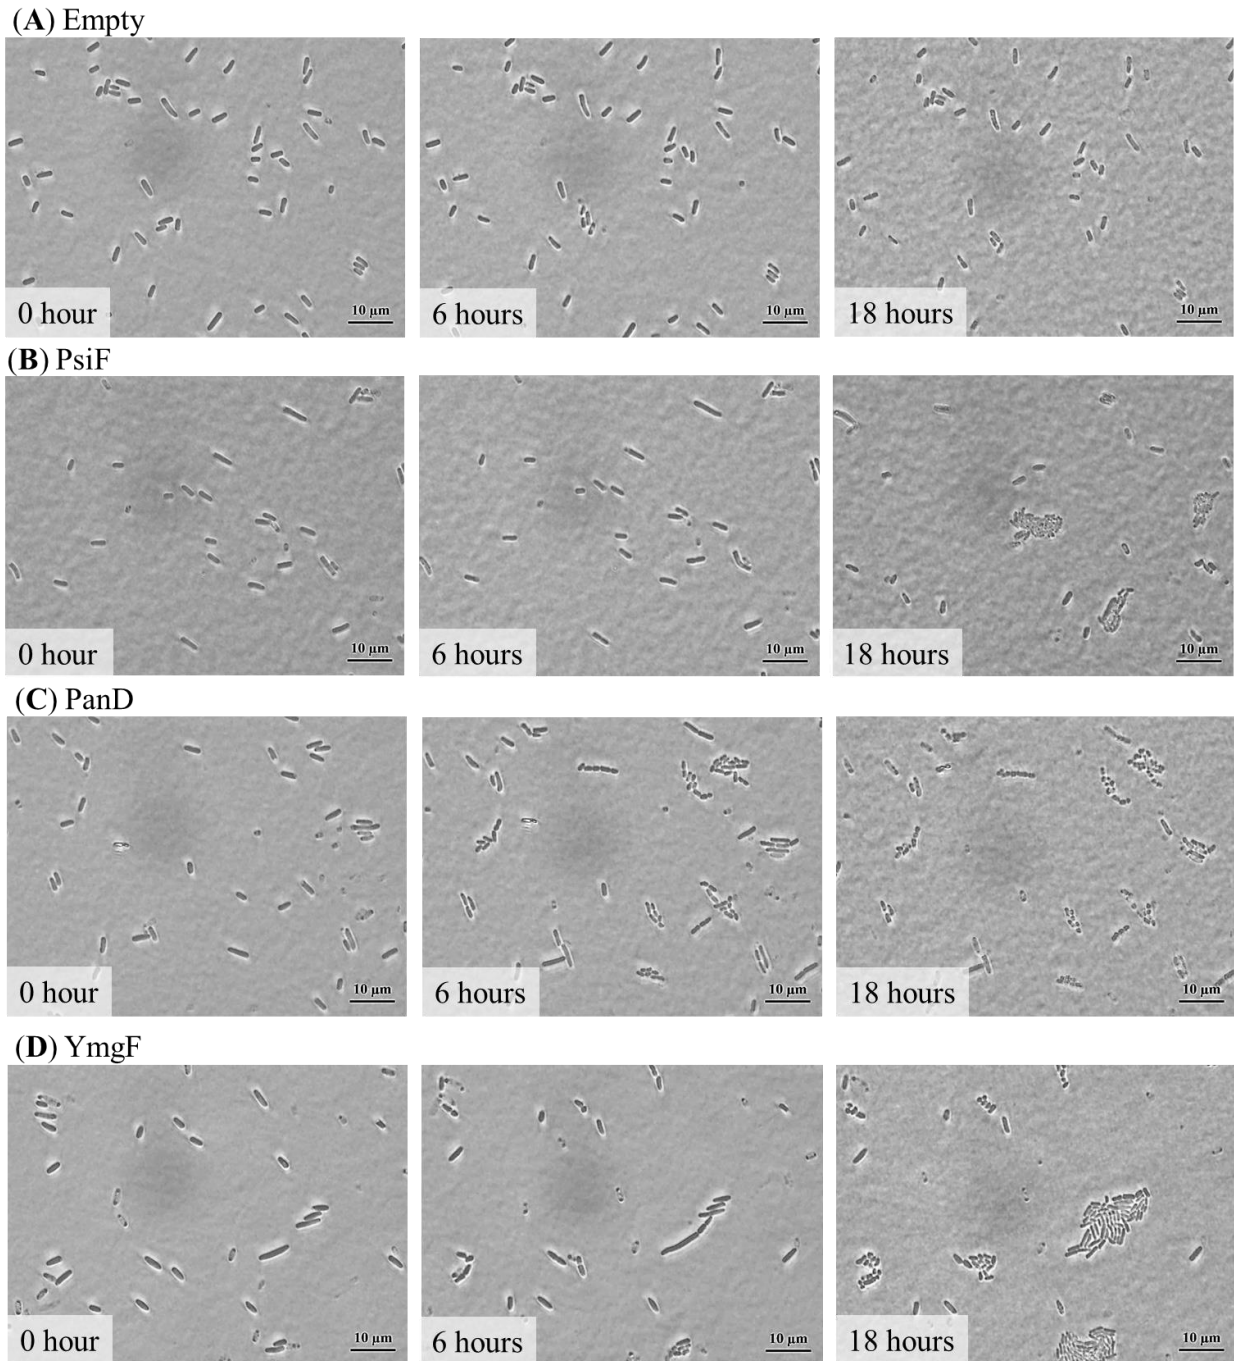

**Supplementary Figure 6. Single persister cell waking on Ala related to the ASKA screen, Related to Figure 3.** *E. coli* BW25113 persister cells containing (A) pCA24N (empty plasmid control), (B) pCA24N\_ψiF, (C) pCA24N\_panD, and (D) pCA24N\_ymgF were incubated at 37°C on M9 5X Ala agarose gel pads for 18 h. Scale bar indicates 10 μm. Representative results from two independent cultures are shown. Prior to forming persister cells, cultures were grown without IPTG with 30 μg/mL Cm.

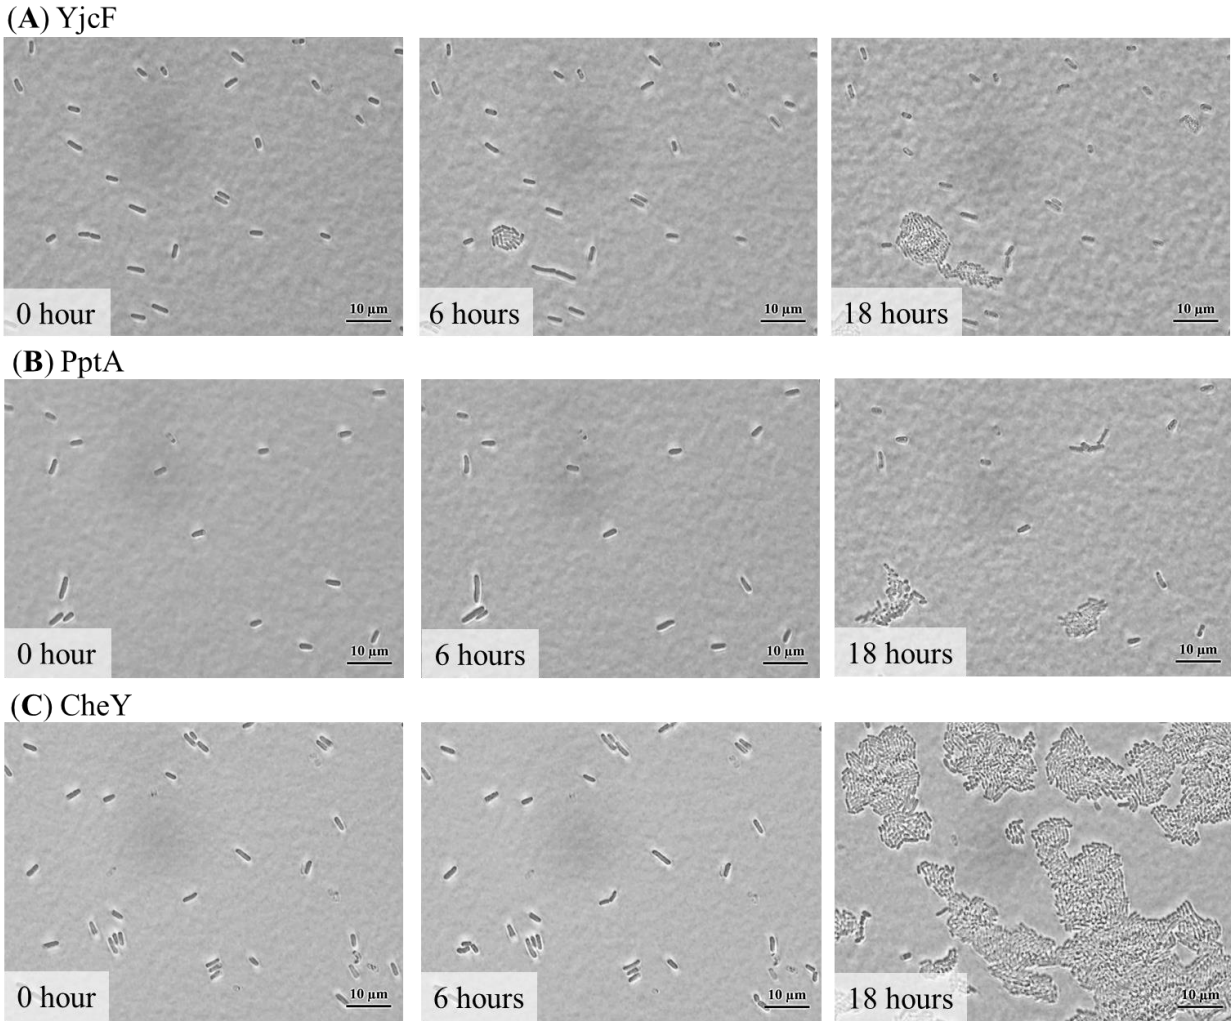

**Supplementary Figure 7. Single persister cell waking on Ala related to the ASKA screen, Related to Figure 3.** *E. coli* BW25113 persister cells containing (A) pCA24N\_*yjcF*, (B), pCA24N\_*pptA*, and (C) pCA24N\_*cheY* were incubated at 37°C on M9 5X Ala agarose gel pads for 18 h. Scale bar indicates 10  $\mu$ m. Representative results from two independent cultures are shown. Prior to forming persister cells, cultures were grown without IPTG with 30  $\mu$ g/mL Cm.



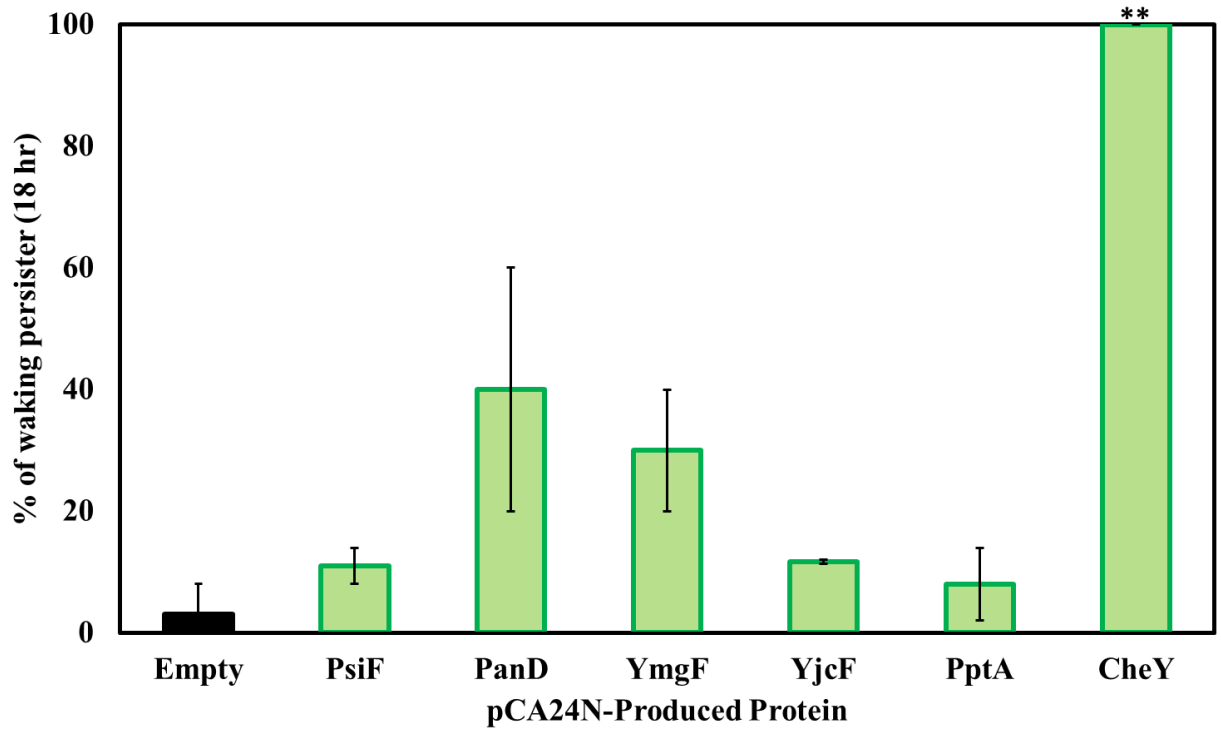

**Supplementary Figure 8. Single persister cell waking on Ala related to the ASKA screen, Related to Figure 3.** Persister cell waking (%) after 18 hours is shown. Error bars indicate standard deviations. Student's t-tests were used to compare two groups (\*\* indicates a p value < 0.01).

(A) CheA

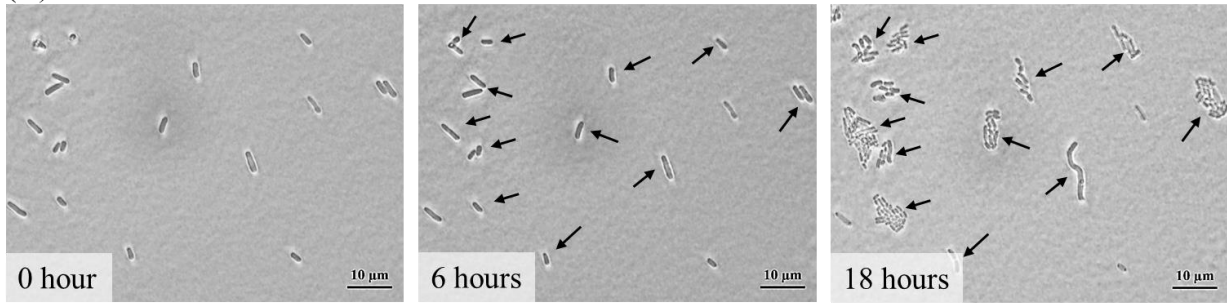

(B) Tar

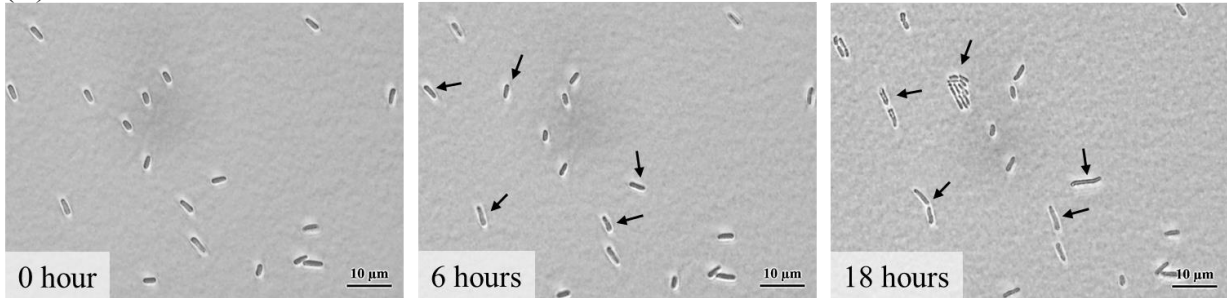

(C) Tsr

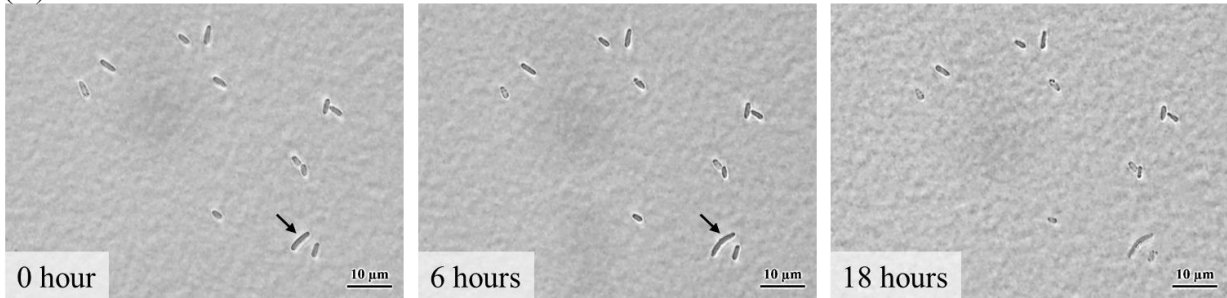

(D) CpdA with 0.5 mM IPTG

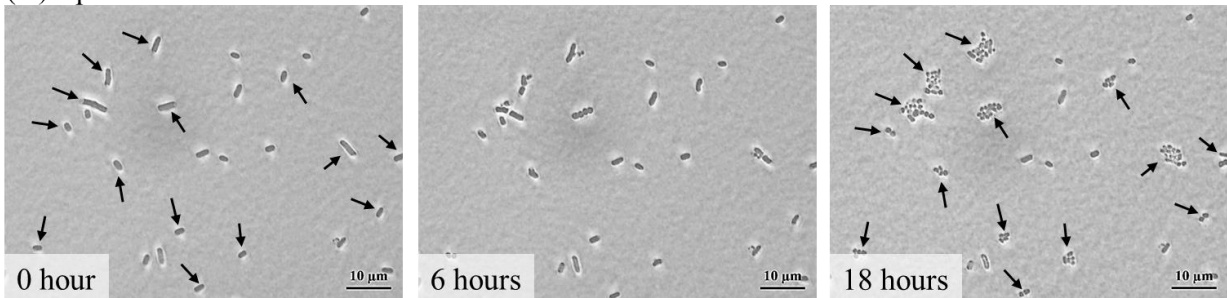

**Supplementary Figure 9. Single persister cell waking on Ala after producing chemotaxis-related and cAMP-related proteins, Related to Figure 3.** *E. coli* BW25113 persister cells containing (A) pCA24N\_ *cheA*, (B) pCA24N\_ *tar*, (C) pCA24N\_ *tsr*, and (D) pCA24N\_ *cpdA* induced by 0.5 mM IPTG were incubated at 37 °C on M9 5X Ala agarose gel pads for 18 h. Black arrows indicate cells that resuscitate. Scale bar indicates 10 μm. Representative results from two independent cultures are shown. Prior to forming persister cells, cultures were grown without IPTG with 30 μg/mL Cm. Tabulated cell numbers are shown in **Table S5**.

(A)  $\Delta cheA$

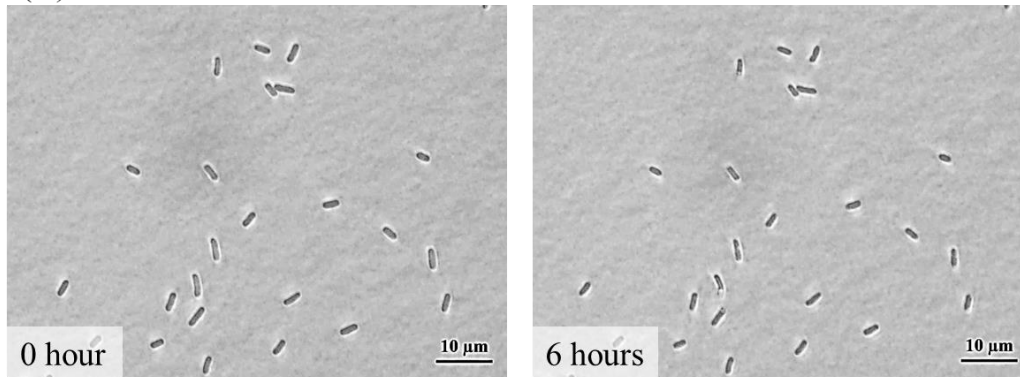

(B)  $\Delta cheY$

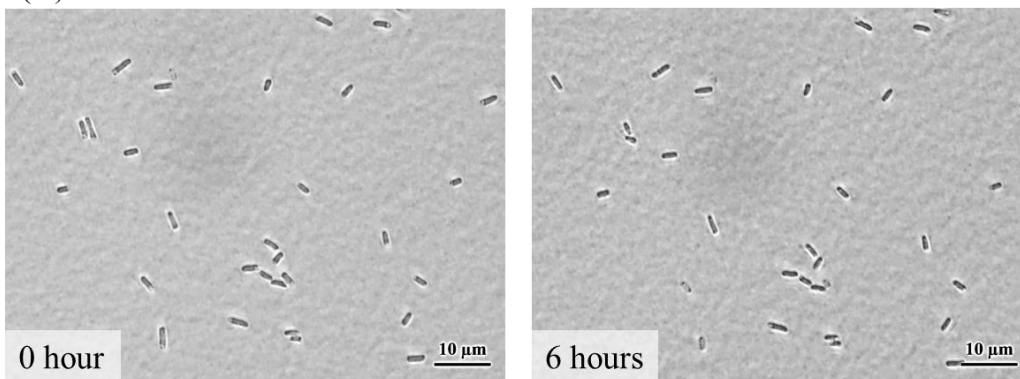

(C)

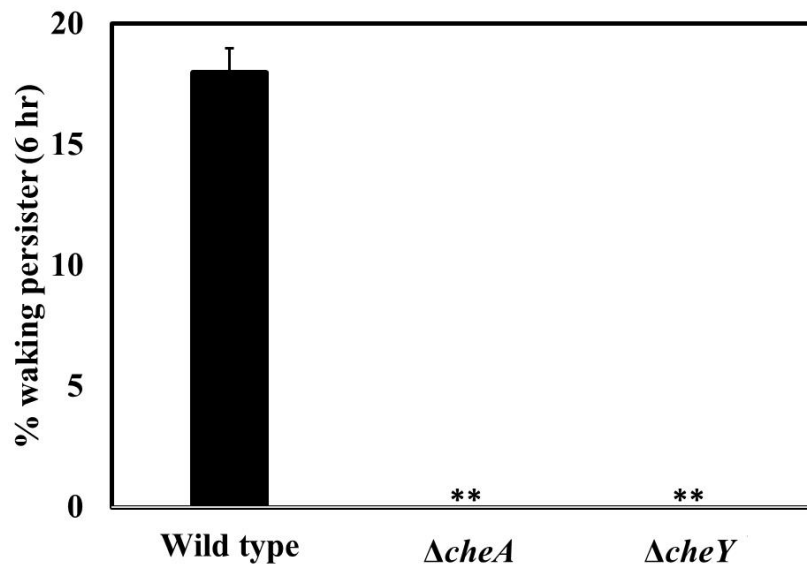

**Supplementary Figure 10. Single persister cell waking on Ala after inactivating chemotaxis proteins CheA and CheY, Related to Figure 3.** Persister cells of (A) BW25113  $\Delta cheA$  and (B) BW25113  $\Delta cheY$  waking on M9 5X Ala agarose gel pads after 6 h at 37°C. Scale bar indicates 10  $\mu\text{m}$ . Representative results from two independent cultures are shown. (C) Persister cell waking (%) after 6 hours is shown. Error bars indicate standard deviations. Student's t-tests were used to compare two groups (\*\* indicates a p value < 0.01).

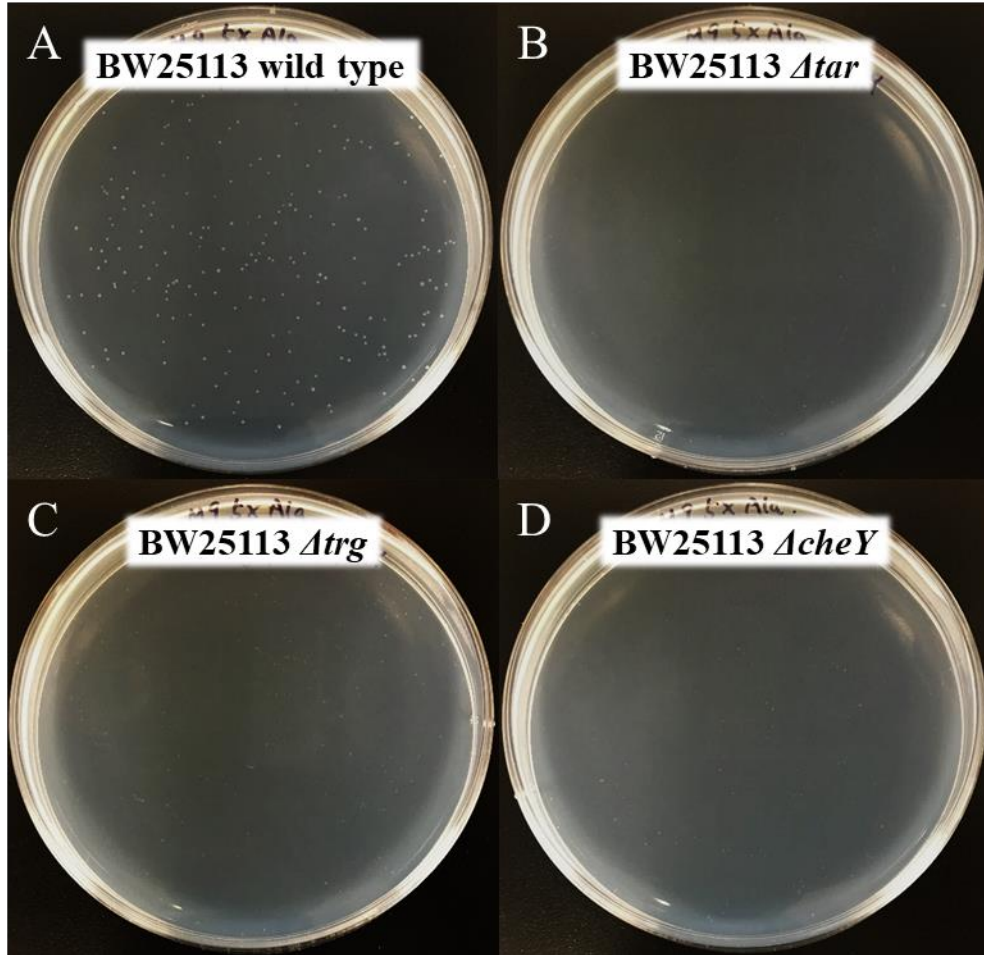

**Supplementary Figure 11. Persister cell waking on Ala agar plates after inactivating the chemotaxis-related proteins Tar, Trg, and CheY, Related to Figure 3.** Persister cells were incubated at 37 °C on M9 5X Ala agar plates for 2 days. (A) wild type BW25113, (B) BW25113  $\Delta tar$ , (C) BW25113  $\Delta trg$ , and (D) BW25113  $\Delta cheY$ . One representative plate of two independent cultures is shown.

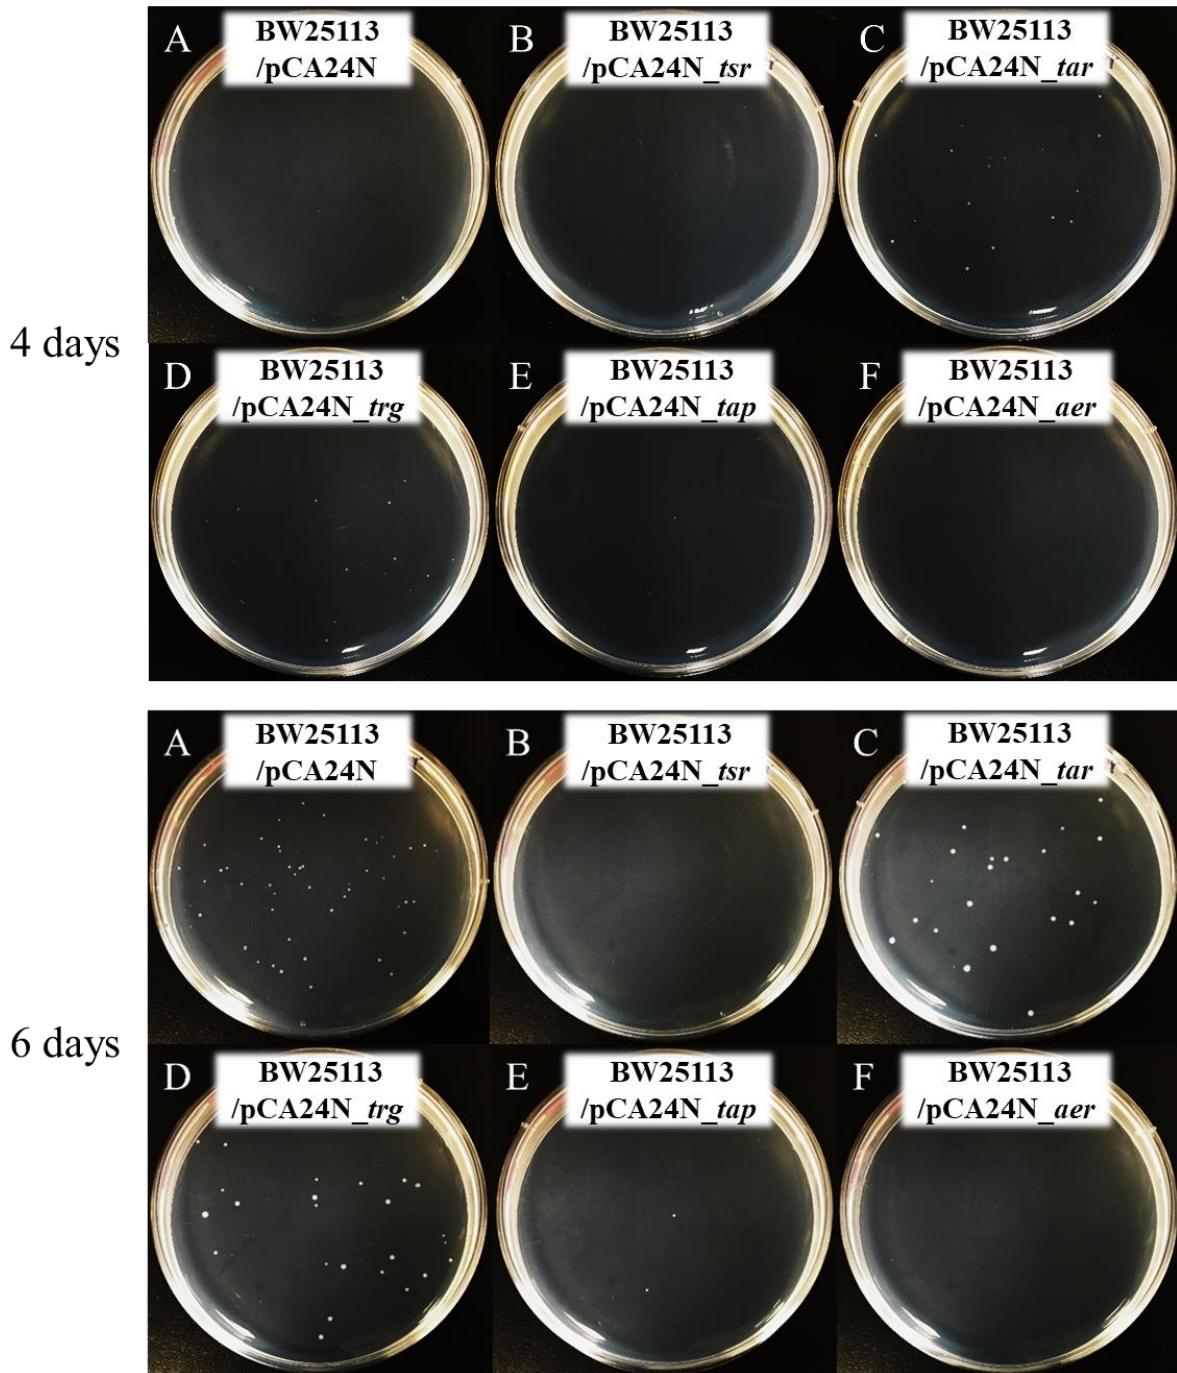

**Supplementary Figure 12. Persister cell waking on Ala agar plates after producing chemotaxis proteins, Related to Figure 3.** Persister waking after 4 days (upper panel) and after 6 days (lower panel) incubation at 37 °C on M9 5X Ala agar plates. (A) BW25113/pCA24N, (B) BW25113/pCA24N\_tsr, (C) BW25113/pCA24N\_tar, (D) BW25113/pCA24N\_trg, (E) BW25113/pCA24N\_tap, and (F) BW25113/pCA24N\_aer. Prior to forming persister cells, cultures were grown without IPTG with 30 µg/mL Cm. One representative plate of two independent cultures is shown.

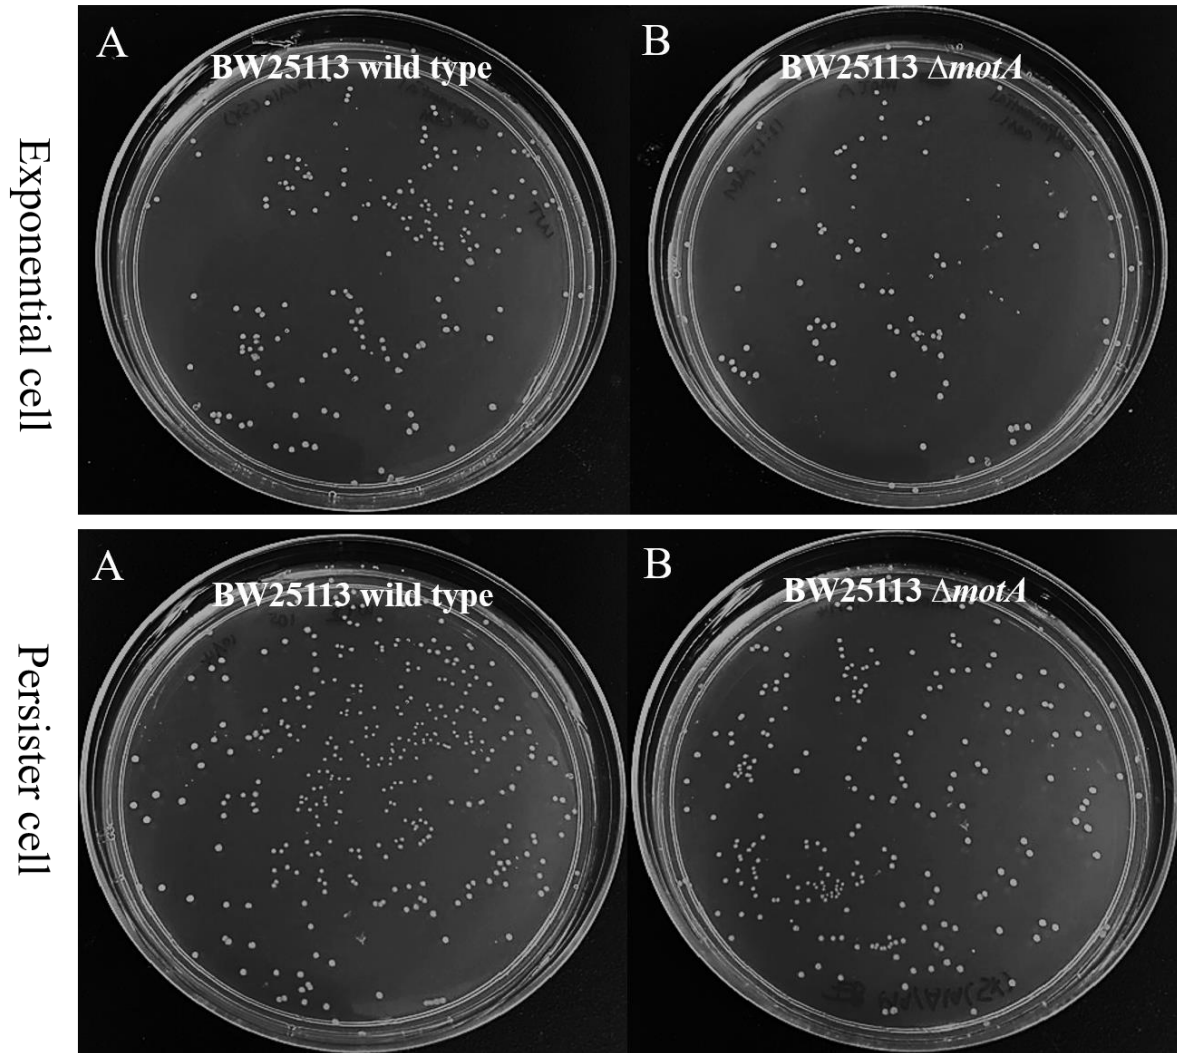

**Supplementary Figure 13. Persister cell waking on Ala agar plates after inactivating flagellar motor complex proteins MotA, Related to Figure 3.** Cells were incubated at 37 °C on M9 5X Ala agar plates for 3 days. **Upper panel:** Exponential cells (A) wild type BW25113 and (B) BW25113  $\Delta motA$ . **Lower panel:** Persister cells of (A) wild type BW25113 and (B) BW25113  $\Delta motA$ . One representative plate of two independent cultures is shown.



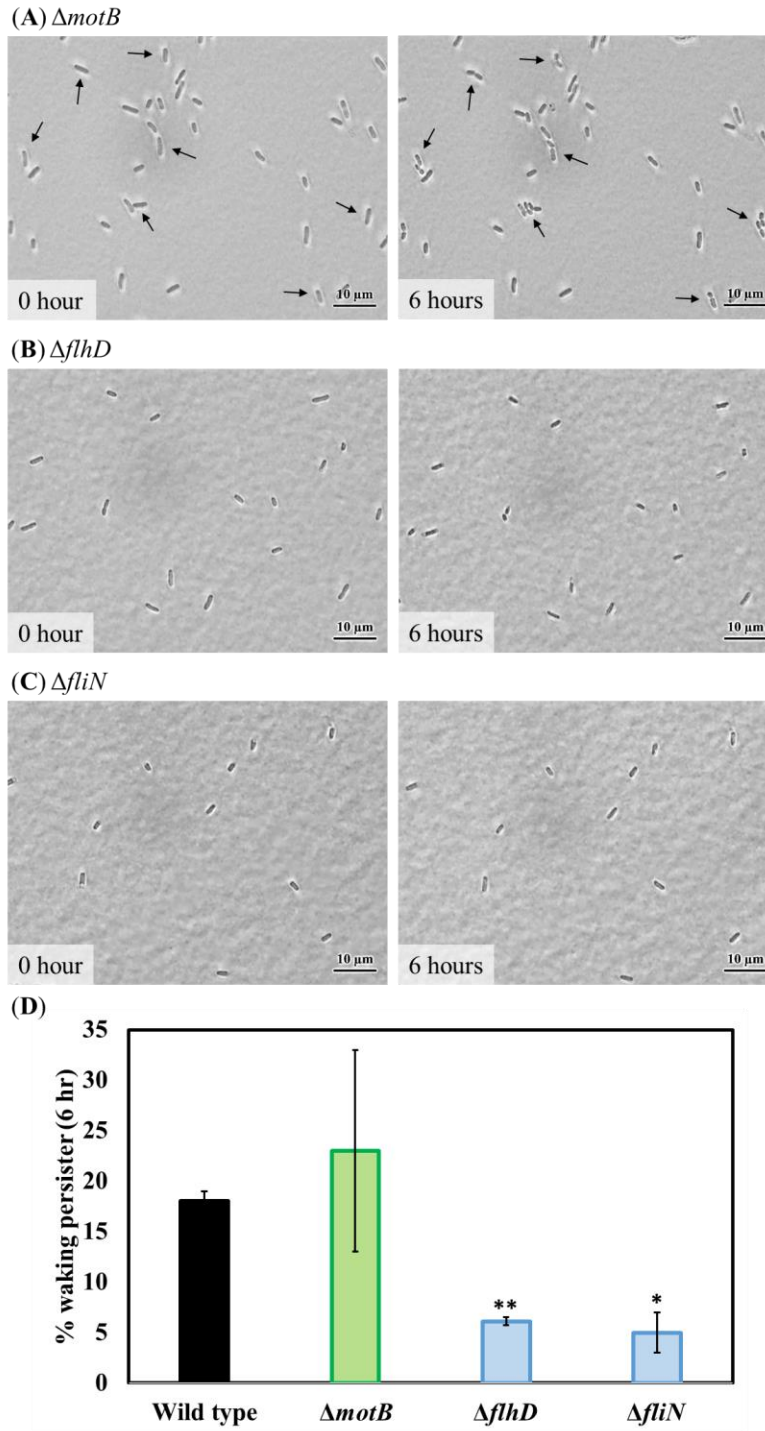

**Supplementary Figure 14. Single persister cell waking on Ala after inactivating flagellar proteins MotB, FhlD, and FliN, Related to Figure 3.** Persister cells of (A) BW25113  $\Delta motB$ , (B) BW25113  $\Delta flhD$ , and (C) BW25113  $\Delta fliN$  waking on M9 5X Ala agarose gel pads after 6 h at 37°C. Black arrows indicate cells that resuscitate. Scale bar indicates 10  $\mu$ m. Representative results from two independent cultures are shown. (D) Persister cell waking (%) after 6 hours is shown. Error bars indicate standard deviations. Student's t-tests were used to compare two groups (\* indicates a p value < 0.05 and \*\* indicates a p value < 0.01). Tabulated cell numbers are shown in **Table S7**.

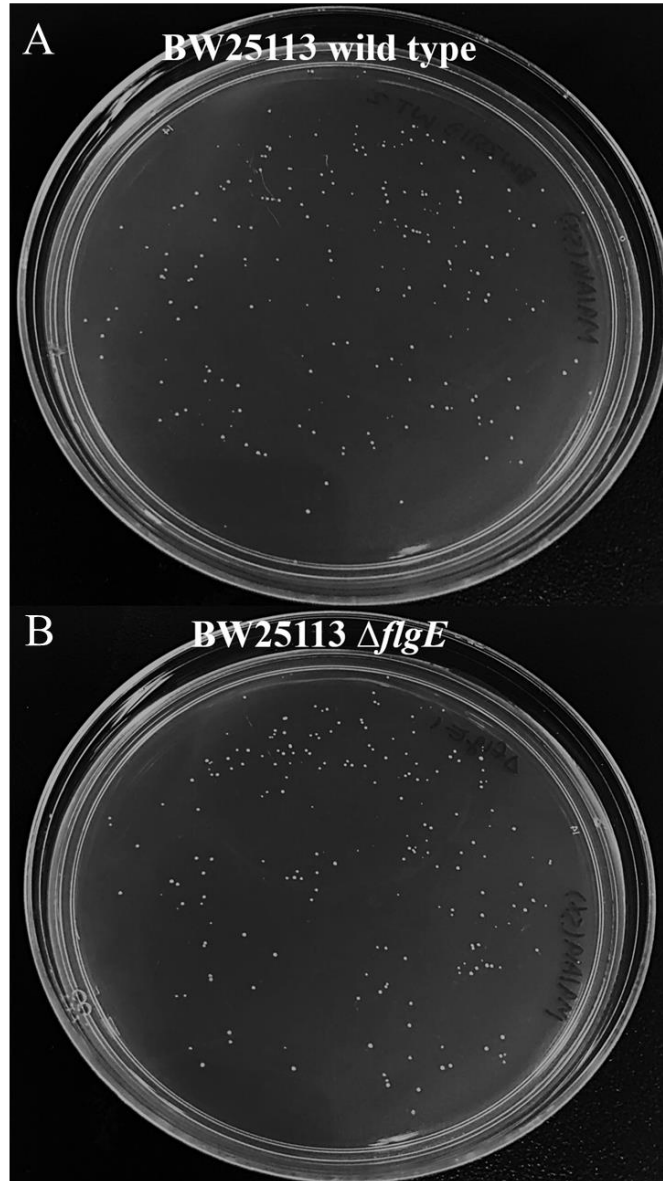

**Supplementary Figure 15. Persister cell wakening on Ala agar plates after inactivating the FlgE flagellum hook protein, Related to Figure 3.** *E. coli* BW25113 persister cells of (A) wild type BW25113 and (B) BW25113  $\Delta flgE$  were incubated at 37 °C on M9 5X Ala agar plates for 2 days. One representative plate of two independent cultures is shown.

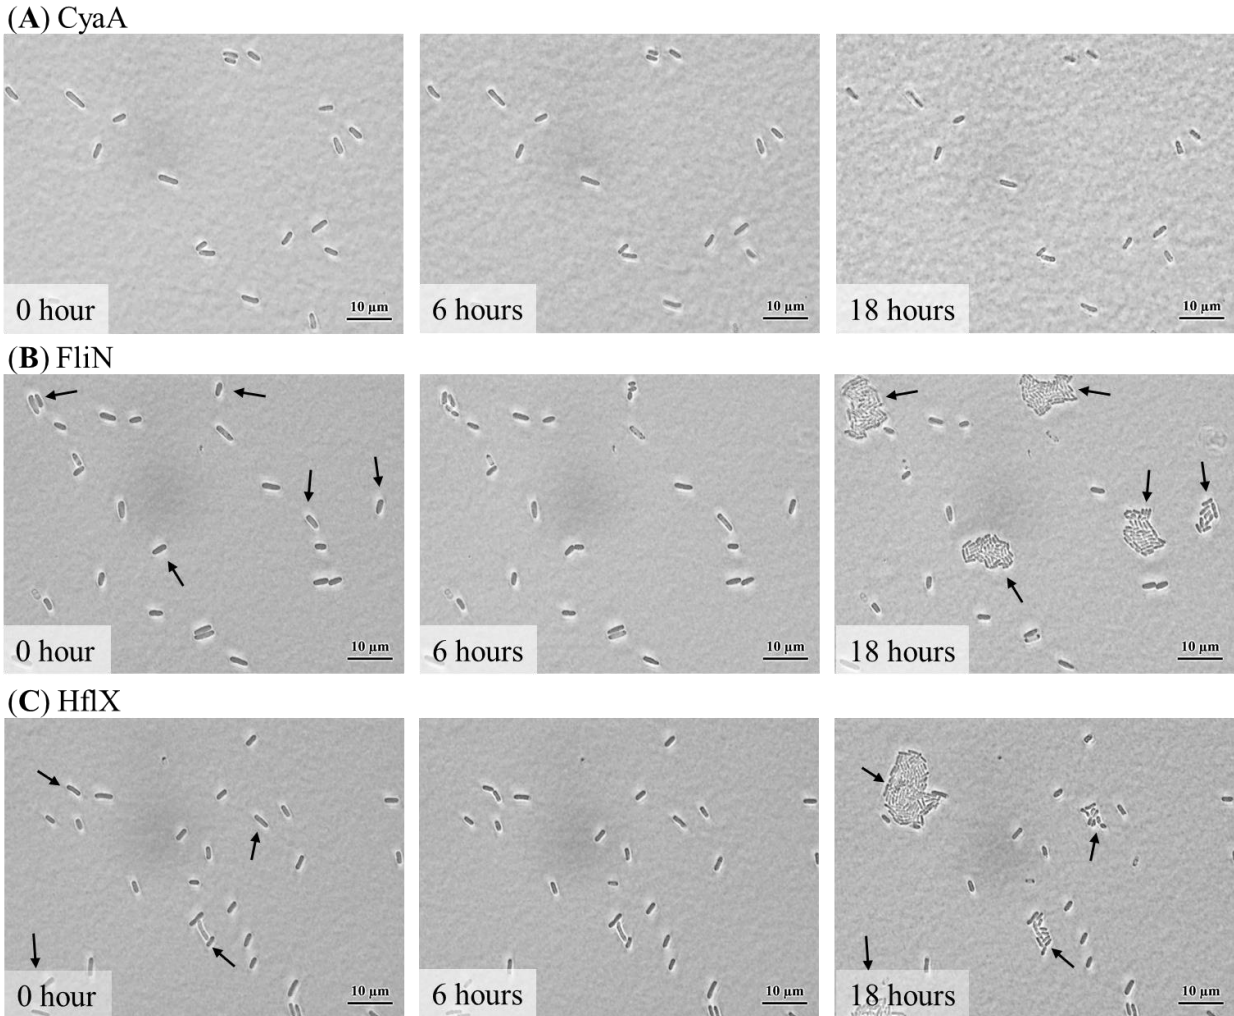

**Supplementary Figure 16. Single persister cell waking on Ala after producing cAMP-related, flagella-related, and ribosome-resuscitation-related proteins, Related to Figure 3.** *E. coli* BW25113 persister cells containing (A) pCA24N\_ *cyaA*, (B) pCA24N\_ *fliN*, and (C) pCA24N\_ *hflX* were incubated at 37 °C on M9 5X Ala agarose gel pads for 18 h. Black arrows indicate cells that resuscitate. Scale bar indicates 10 μm. Representative results from two independent cultures are shown. Prior to forming persister cells, cultures were grown without IPTG with 30 μg/mL Cm. Tabulated cell numbers are shown in **Table S5**.

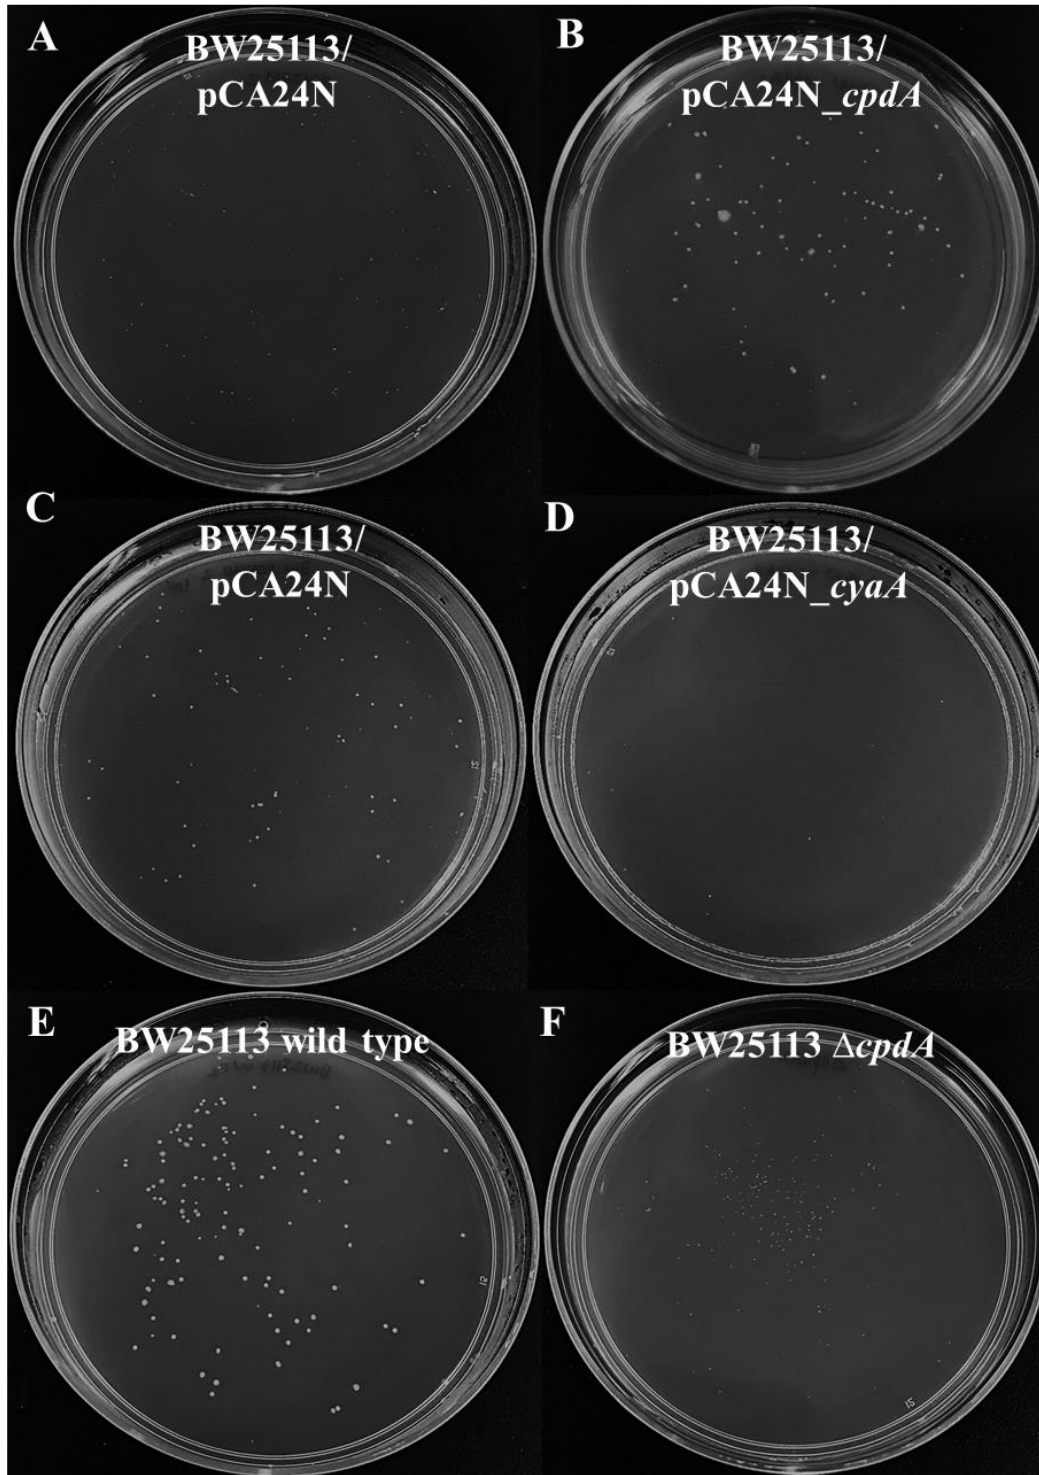

**Supplementary Figure 17. Persister cell waking on Ala agar plates after inactivating or producing proteins related cAMP, Related to Figure 3.** *E. coli* BW25113 persister cells with (A) pCA24N after 4 days, (B) pCA24N\_cpdA after 4 days, (C) pCA24N after 5 days, (D) pCA24N\_cyaA after 5 days, (E) wild type BW25113 after 3 days, and (F) BW25113  $\Delta$ cpdA after 3 days. Plates were incubated at 37 °C and contain M9 5X Ala. One representative plate of two independent cultures is shown.

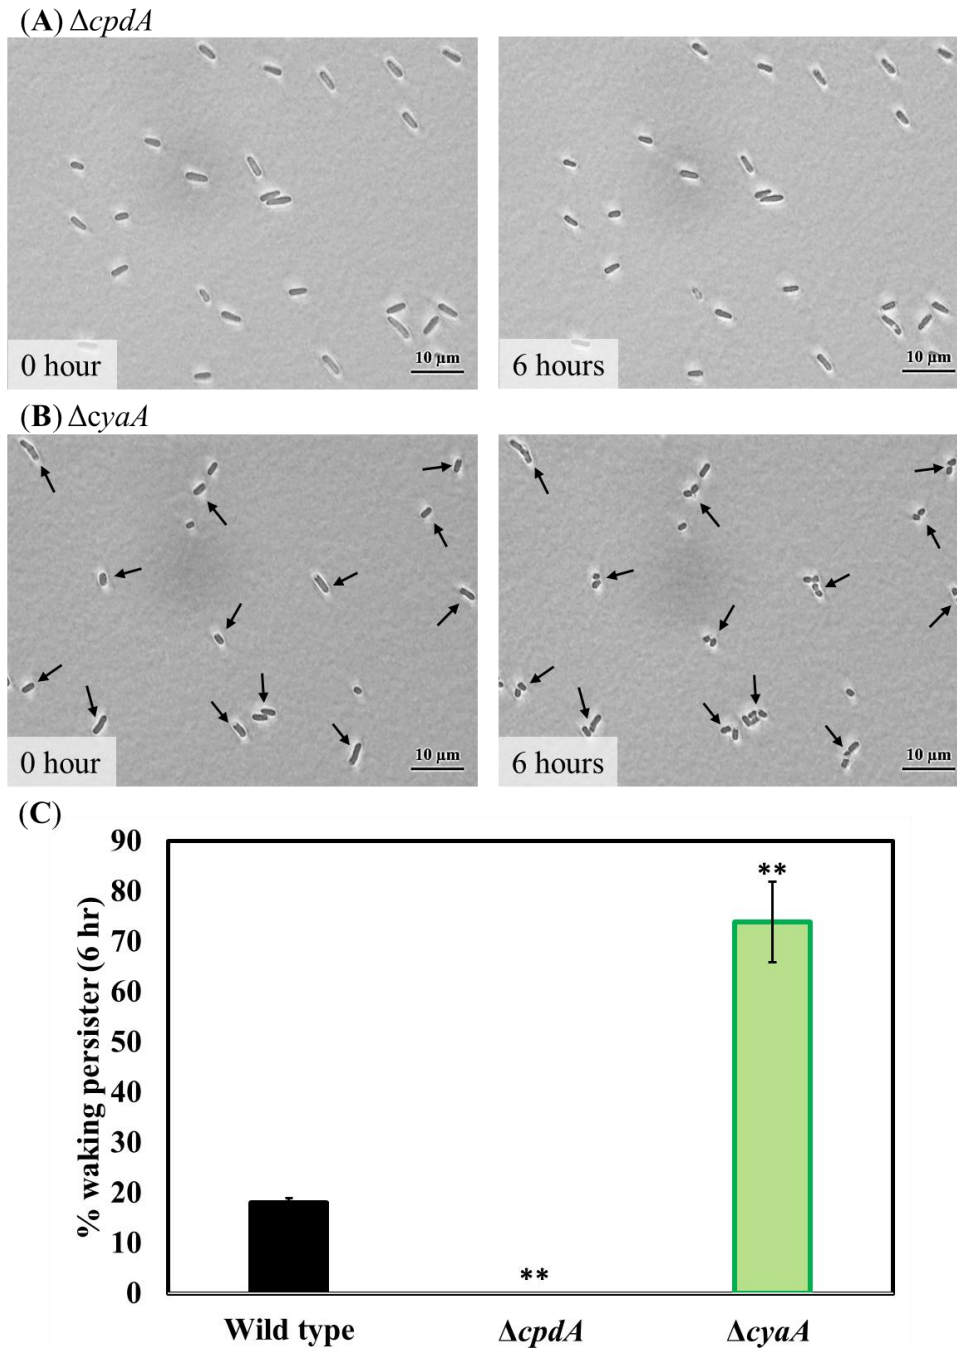

**Supplementary Figure 18. Single persister cell waking on Ala after inactivating cAMP-related proteins CpdA and CyaA, Related to Figure 3.** Persister cells of (A) BW25113  $\Delta cpdA$  and (B) BW25113  $\Delta cyaA$  waking on M9 5X Ala agarose gel pads after 6 h at 37°C. Scale bar indicates 10  $\mu$ m. Representative results from two independent cultures are shown. (C) Persister cell waking (%) after 6 hours is shown. Error bars indicate standard deviations. Student's t-tests were used to compare two groups (\*\* indicates a p value < 0.01). Tabulated cell numbers are shown in **Table S8**.

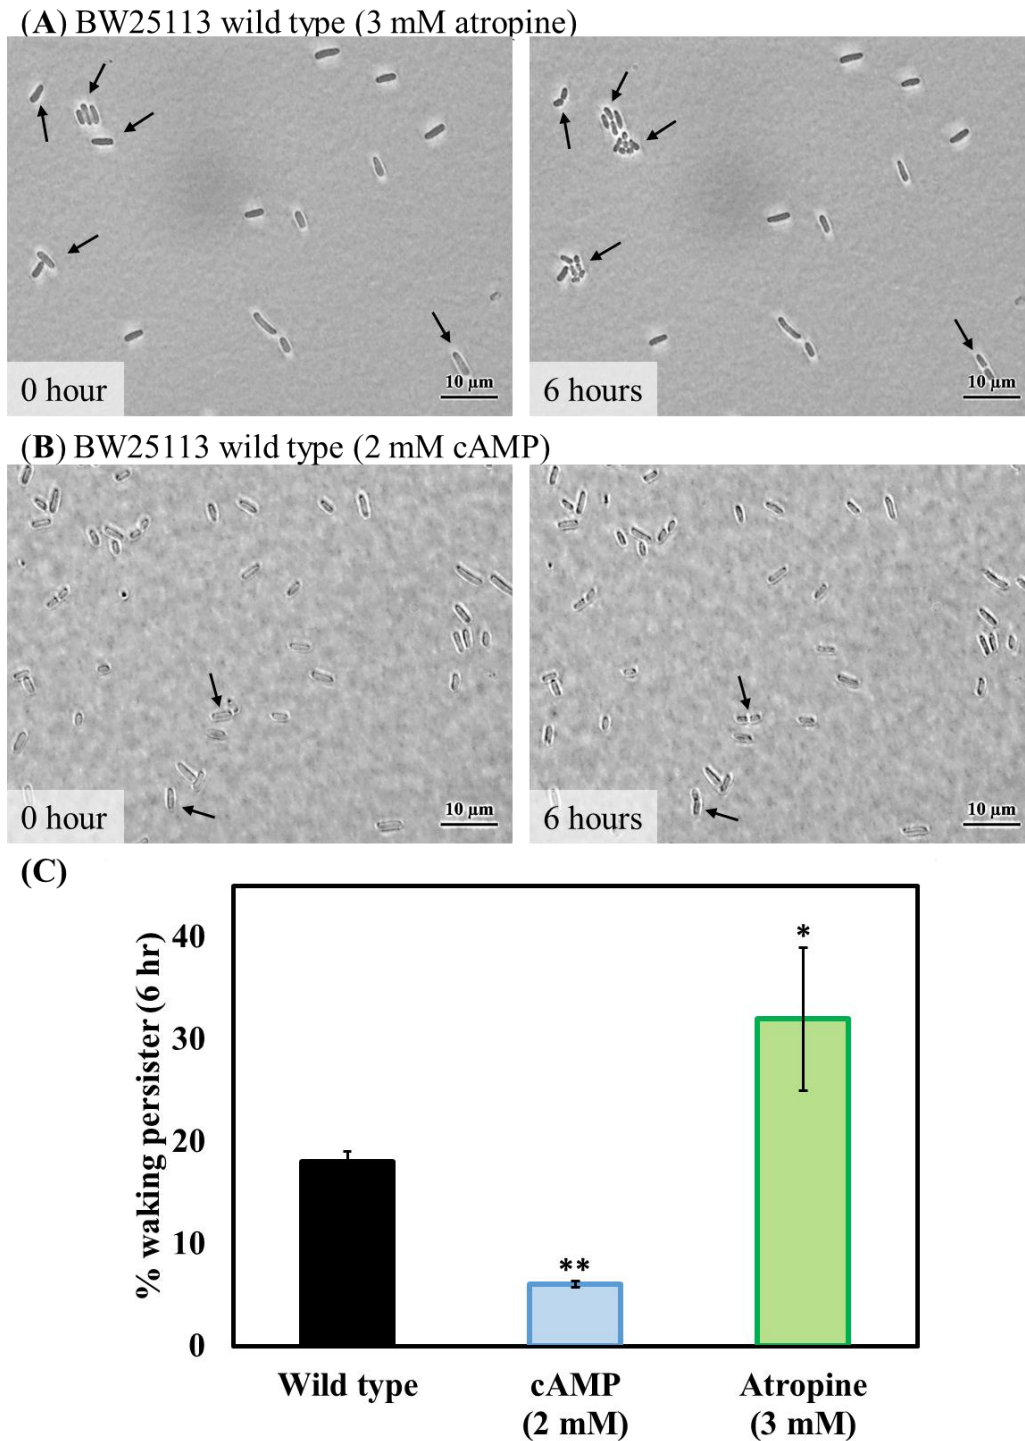

**Supplementary Figure 19. Single persister cell waking on Ala with exogenous atropine and cAMP, Related to Figure 3.** Persister cells of wild-type BW25113 waking on M9 5X Ala on agarose gel pads with (A) 3 mM atropine or (B) 2 mM cAMP after 6 h at 37°C. Black arrows indicate cells that resuscitate. Scale bar indicates 10 μm. Representative results from two independent cultures are shown. (C) Persister cell waking (%) after 6 hours is shown. Error bars indicate standard deviations. Student's t-tests were used to compare two groups (\* indicates a p value < 0.05 and \*\* indicates a p value < 0.01).



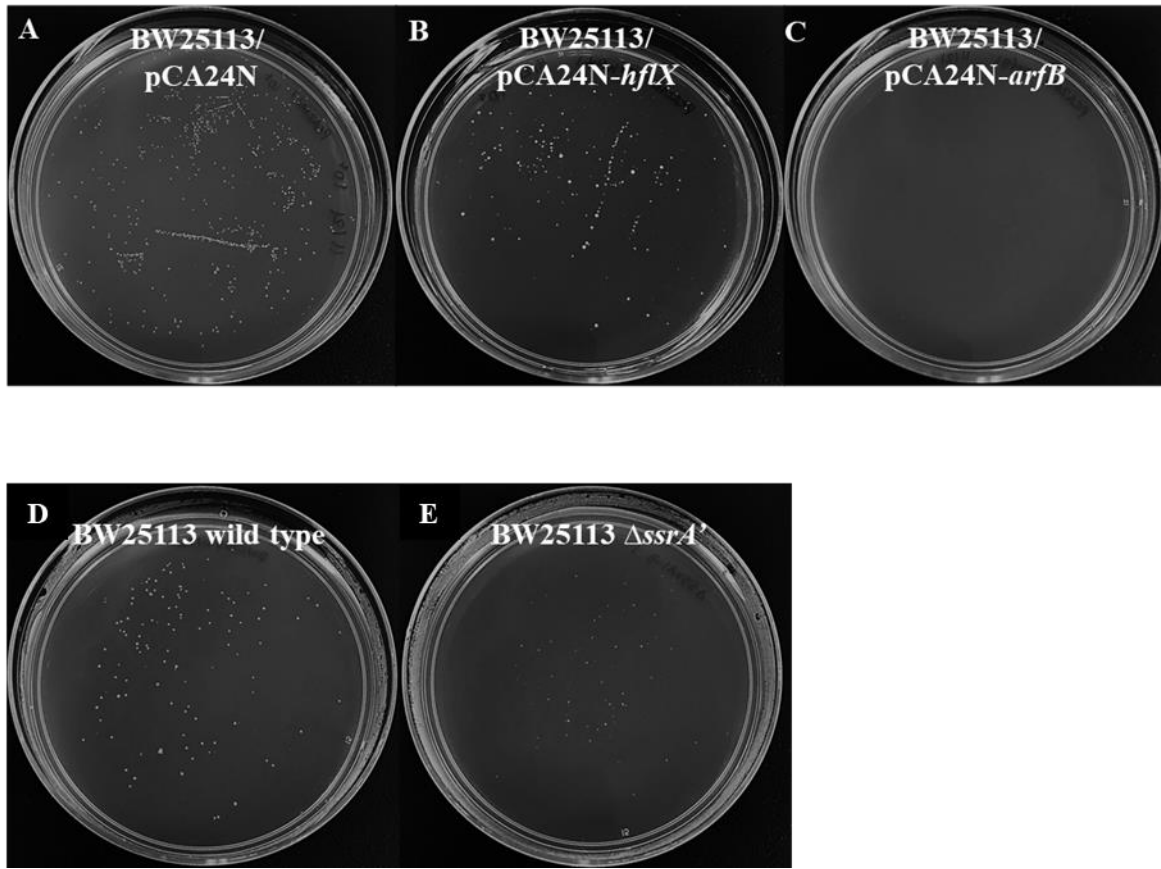

**Supplementary Figure 20. Persister cells waking on Ala agar plates after producing HflX and ArfB and inactivating SsrA, Related to Figure 3.** *E. coli* BW25113 persister cells with (A) empty plasmid, (B) pCA24N\_ *hflX*, and (C) pCA24N\_ *arfB* were incubated at 37 °C on M9 5X Ala agar plates for 6 days. *E. coli* BW25113 persister cells with (D) wild type and (E) BW25113  $\Delta$ *ssrA*'. One representative plate of two independent cultures is shown.

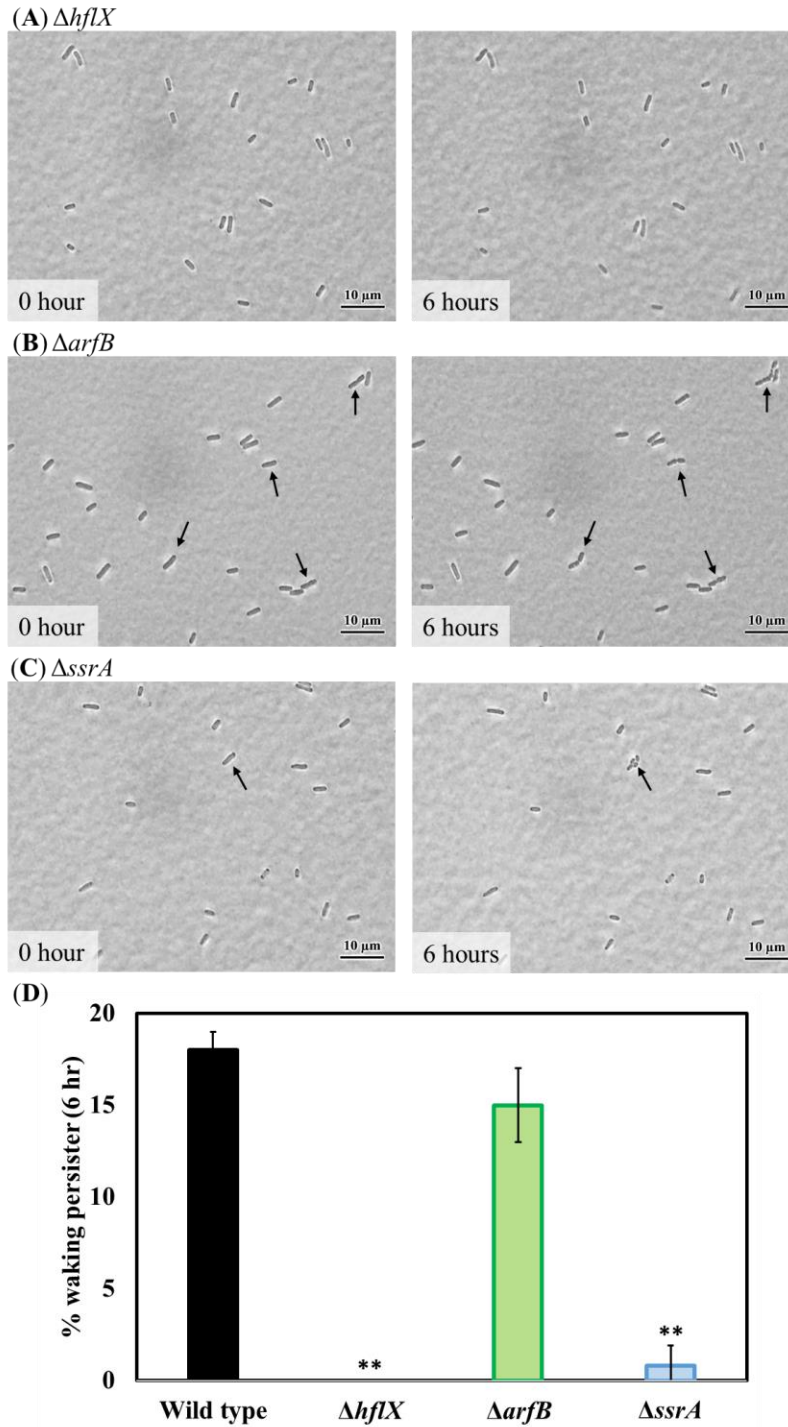

**Supplementary Figure 21. Single persister cell waking on Ala after inactivating ribosome rescue proteins, Related to Figure 3.** Persister cells of (A) BW25113  $\Delta hf1X$ , (B) BW25113  $\Delta arfB$ , and (C) BW25113  $\Delta ssrA$ , waking on M9 5X Ala agarose gel pads after 6 h at 37°C. Black arrows indicate cells that resuscitate. Scale bar indicates 10 μm. Representative results from two independent cultures are shown. (D) Persister cell waking (%) after 6 hours is shown. Error bars indicate standard deviations. Student's t-tests were used to compare two groups (\*\* indicates a p value < 0.01). Tabulated cell numbers are shown in **Table S9**.

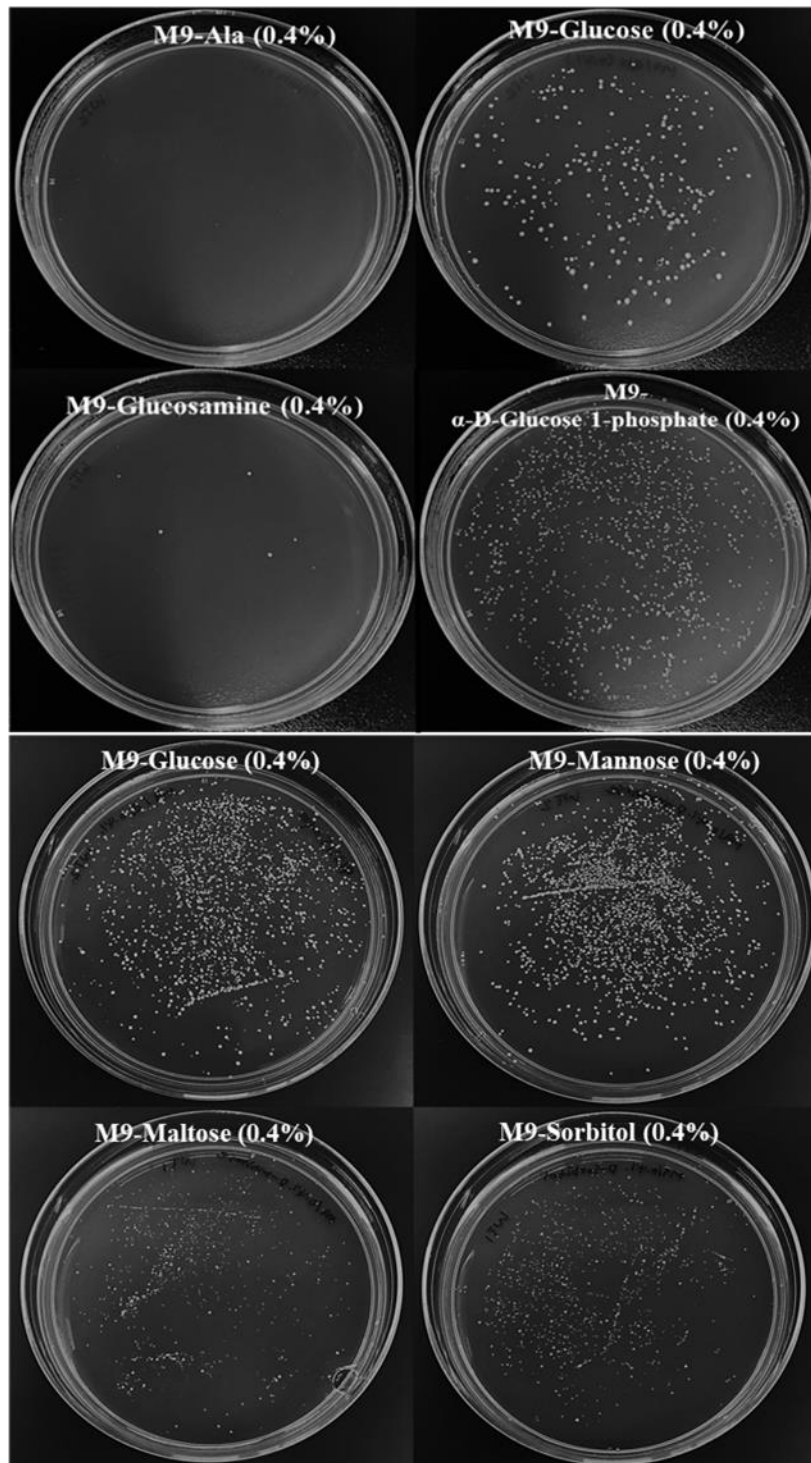

**Supplementary Figure 22. Persister cell waking on agar plates with polysaccharides as the sole carbon source, Related to Figure 4.** Persister cell waking of the wild type strain on M9 agar plates with alanine (0.4%), glucose (0.4%), glucosamine (0.4%) (*D*-glucosamine + *N*-acetyl-*D*-glucosamine),  $\alpha$ -*D*-glucose 1-phosphate (0.4%), mannose (0.4%), maltose (0.4%), and sorbitol (0.4%). Plates were incubated at 37°C for 3 days. One representative plate of two independent cultures is shown.

**(A)  $\alpha$ -D-glucose-1-phosphate**

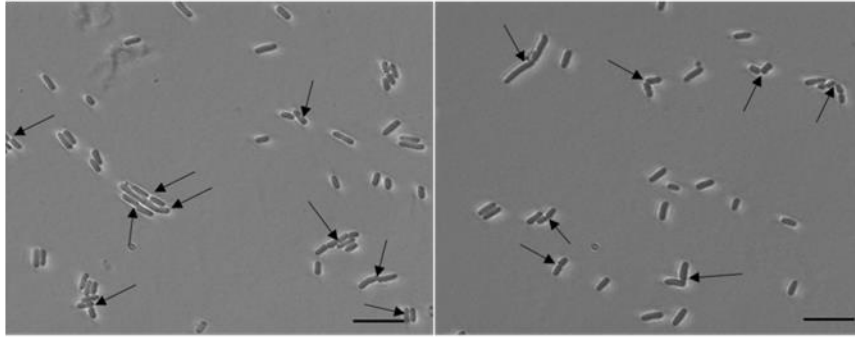

**Mannose**

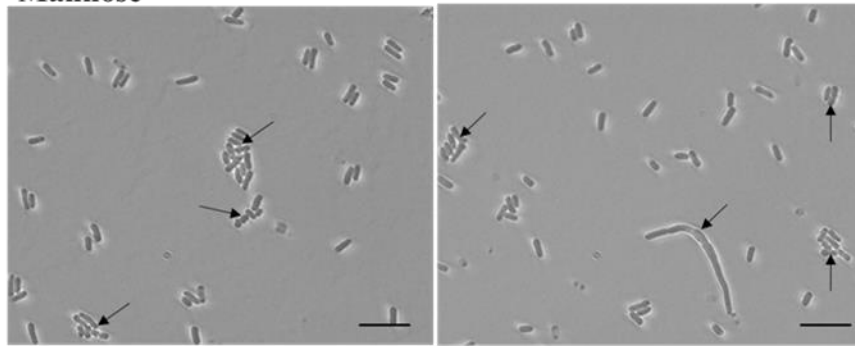

**(B)**

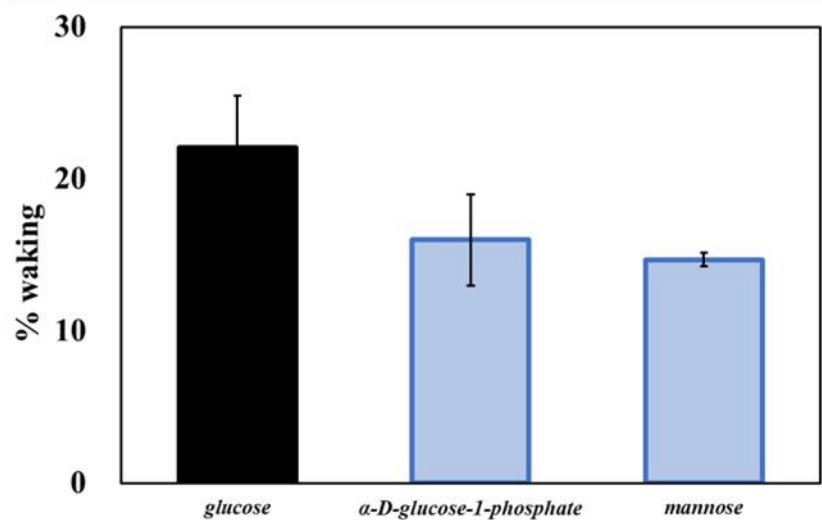

**Supplementary Figure 23. Persister cell waking on agar plates with polysaccharides as the sole carbon source, Related to Figure 4.** (A) Persister cell waking of the wild type strain on M9 0.4%  $\alpha$ -D-glucose 1-phosphate and 0.4% mannose agarose gel pads after 3 h at 37°C. Black arrows indicate cells that resuscitate. Scale bar indicates 10  $\mu$ m. Representative results from two independent cultures are shown. (B) Persister cell waking (%) on the three best sugars (glucose,  $\alpha$ -D-glucose 1-phosphate, mannose) after 3 h. Error bars indicate standard deviations.

**(A)**

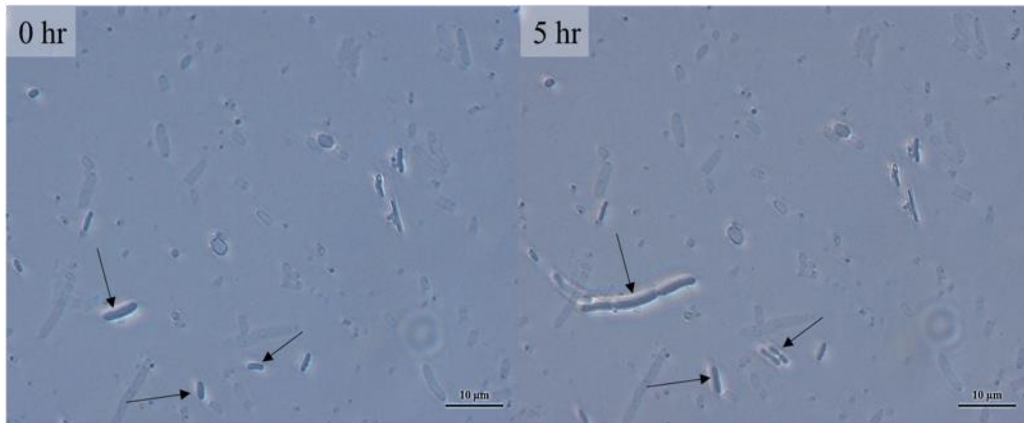

**(B)**

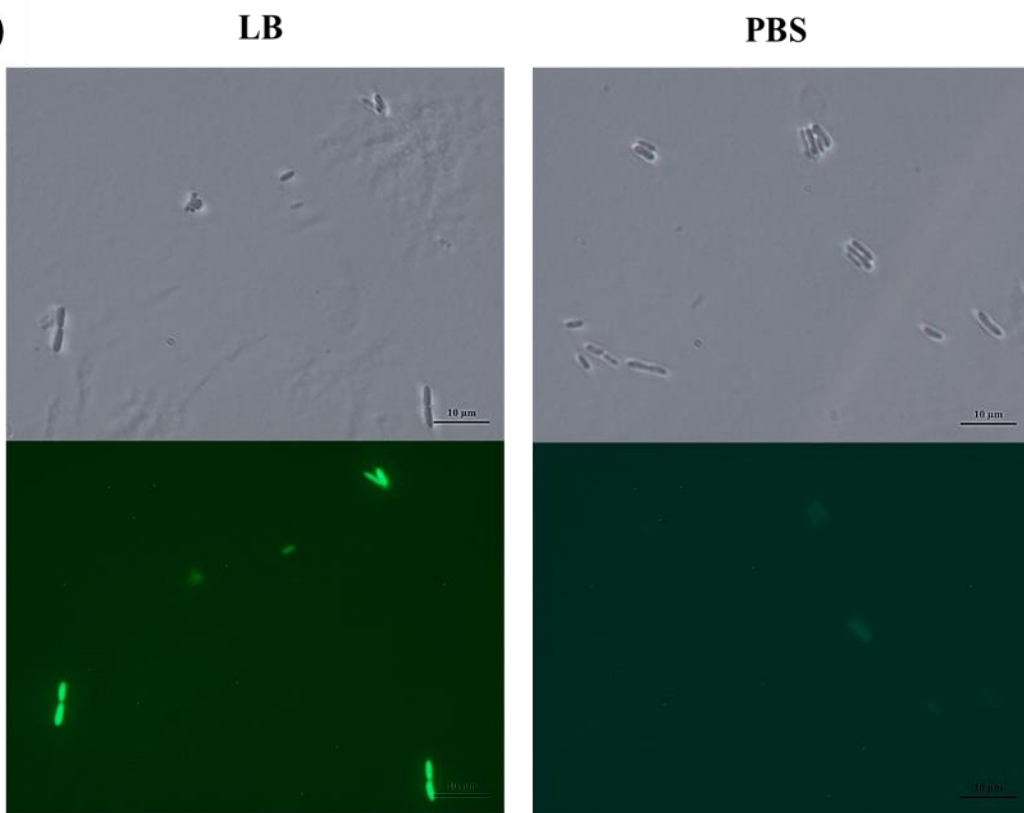

**Supplementary Figure 24. Biofilm persister cells waking via ribosome activation induced by nutrients, Related to Figure 4.** (A) Persister cells harvested from biofilms of *E. coli* BW25113/pCA24N waking on a M9 0.4% glucose agar gel pad after 5 h at 37°C. Black arrows indicate cells that resuscitate. (B) Active 70S ribosomes in single persister cells for MG1655-ASV on LB (left) and PBS (right). Cells are shown on LB agarose pads, and PBS gel pads after 1 h at 37°C. The **upper panel** indicates dark field and the **lower panel** indicates shows GFP fluorescence. Scale bars indicate 10 μm. Representative results from two independent cultures are shown

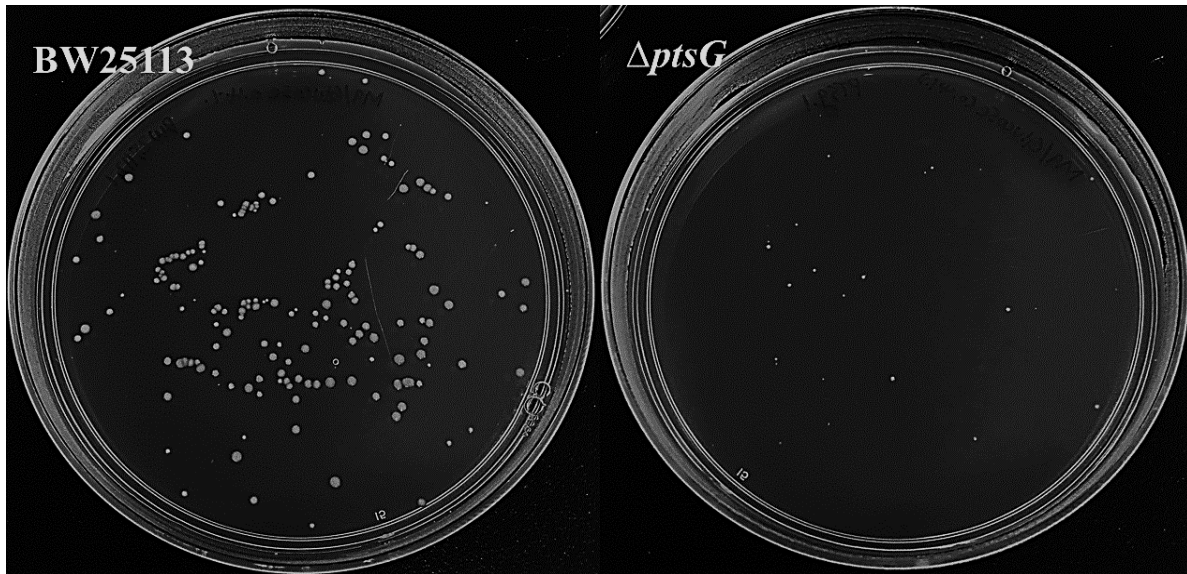

**Supplementary Figure 25. Persister cell waking on glucose agar plates after inactivating PtsG, Related to Figure 5.** Persister cell waking of the wild type (left panel) and the  $\Delta ptsG$  mutant (right panel) on M9 0.4% glucose agar plates incubated at 37 °C for 2 days. One representative plate of two independent cultures is shown.



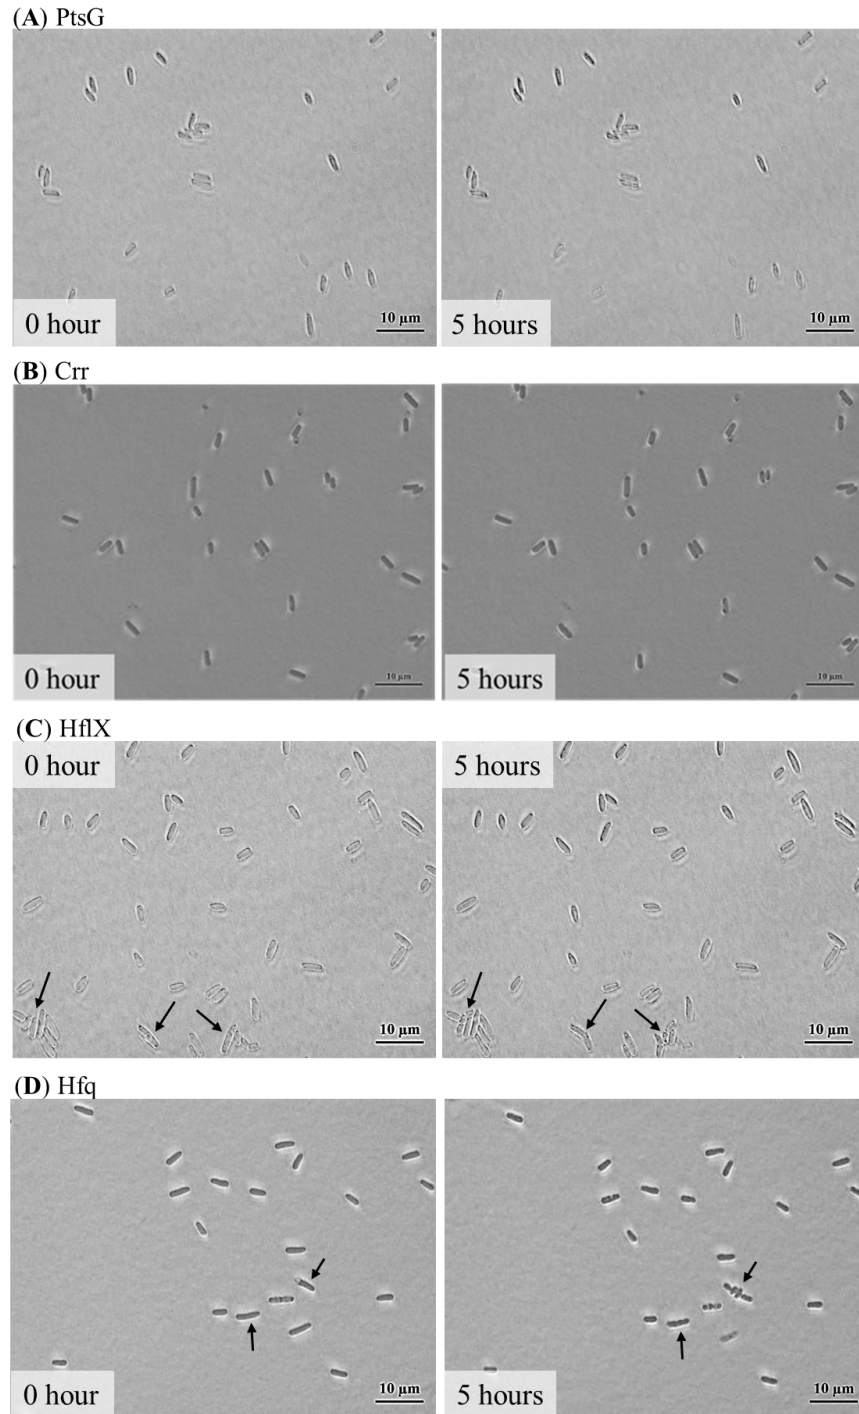

**Supplementary Figure 26. Single persister cell waking on glucose after producing proteins related to transport, ribosome resuscitation, and sRNA, Related to Figure 6.** *E. coli* BW25113 persister cells containing (A) pCA24N\_ptsG, (B) pCA24N\_crr, (C) pCA24N\_hflX, and (D) pCA24N\_hfq were incubated at 37 °C on M9 0.4% glucose agarose gel pads for 5 h. Black arrows indicate cells that resuscitate. Scale bar indicates 10 μm. Representative results from two independent cultures are shown. Prior to forming persister cells, cultures were grown without IPTG with 30 μg/mL Cm. Tabulated cell numbers are shown in **Table S12**.

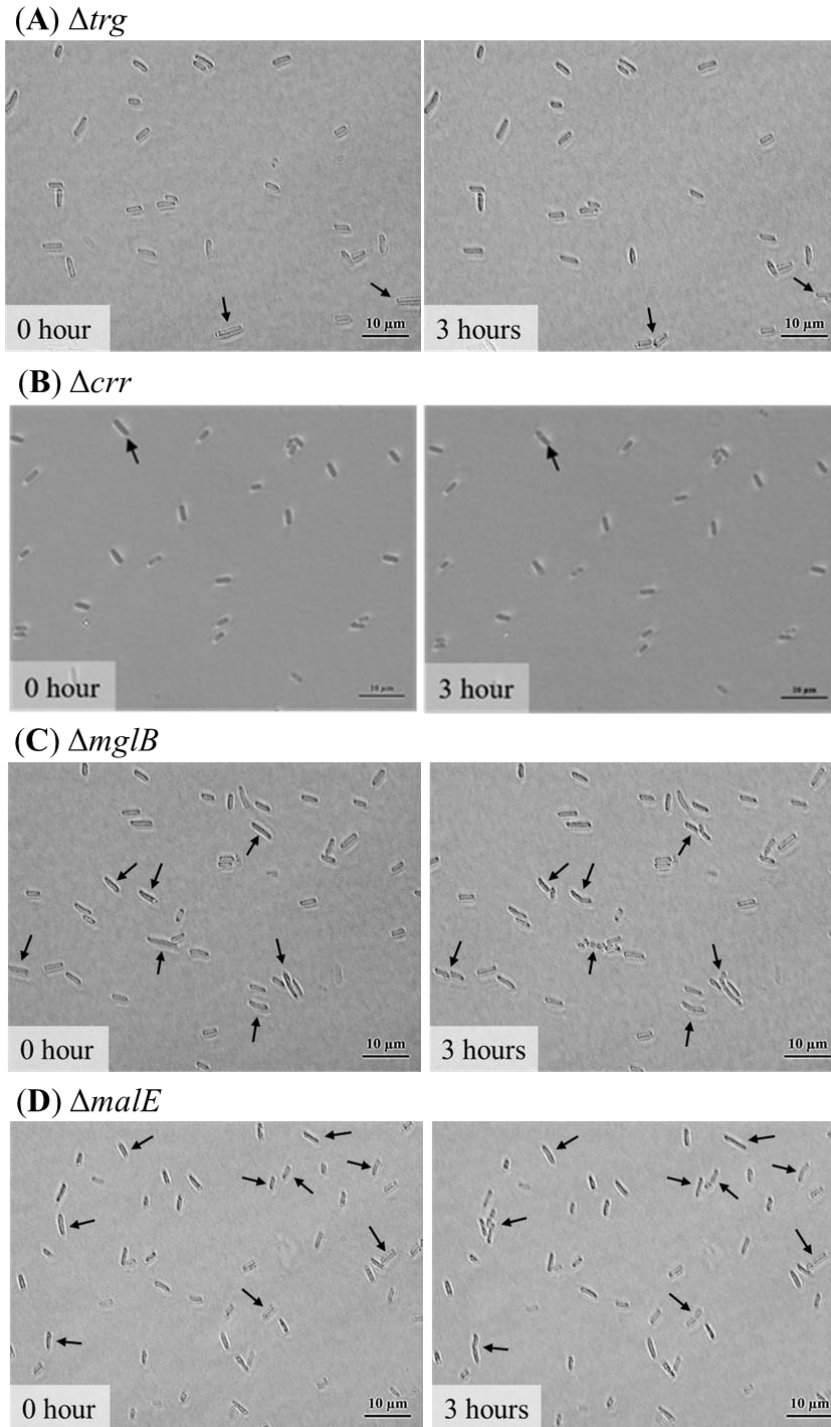

**Supplementary Figure 27. Single persister cell waking on glucose after inactivating proteins related to transport, Related to Figure 5.** *E. coli* BW25113 persister cells isogenic deletion mutants (A)  $\Delta trg$ , (B)  $\Delta crr$ , (C)  $\Delta mglB$ , and (D)  $\Delta malE$  were incubated at 37 °C on 0.4% glucose agarose gel pads for 3 h. Black arrows indicate cells that resuscitate. Scale bar indicates 10  $\mu$ m. Representative results from two independent cultures are shown. Tabulated cell numbers are shown in **Table S11**.

(A)

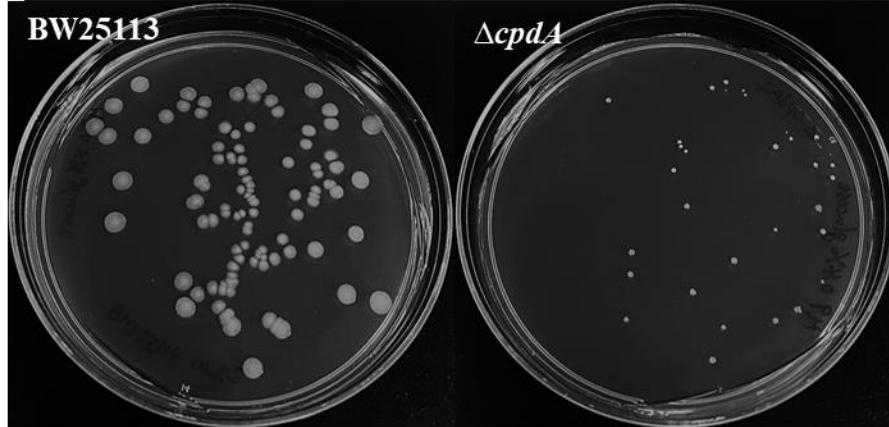

(B)

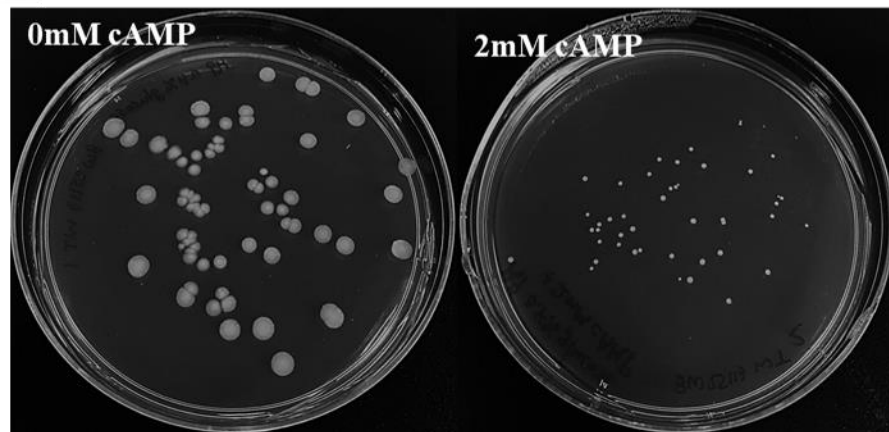

**Supplementary Figure 28. Persister cell waking on glucose agar plates after increasing cAMP, Related to Figure 5.** Persister cell waking of (A) wild type and the  $\Delta cpdA$  mutant and (B) wild type with 0 mM and 2 mM cAMP on M9 0.4% glucose agar plates incubated at 37 °C on for 2 days. One representative plate of two independent cultures is shown.

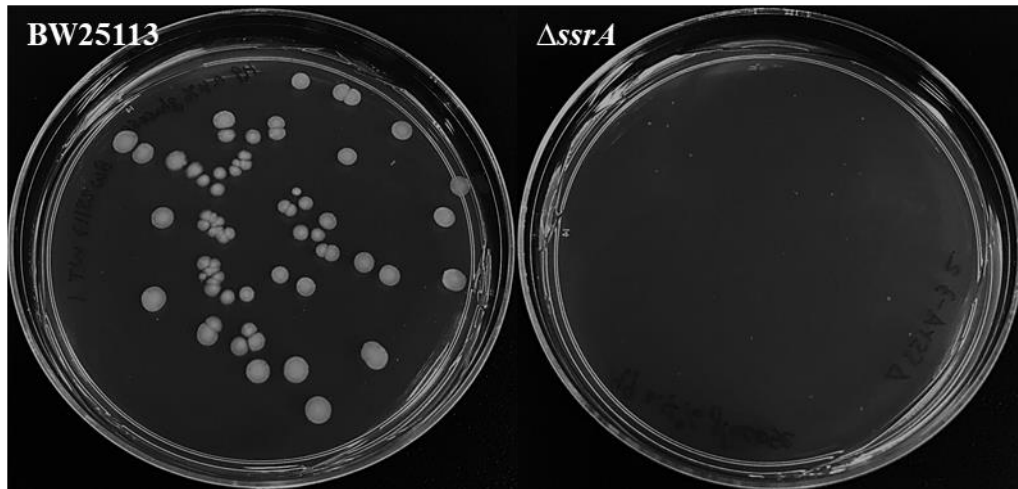

**Supplementary Figure 29. Persister cell waking on glucose agar plates for  $\Delta ssrA$ , Related to Figure 5.** Persister cell waking for the wild type (left panel) and the  $\Delta ssrA$  mutant (right panel) on M9 0.4% glucose agar plates incubated at 37 °C for 2 days. One representative plate of two independent cultures is shown.

**(A) Wild type persister cells**

**(B) Wild type stationary cells**

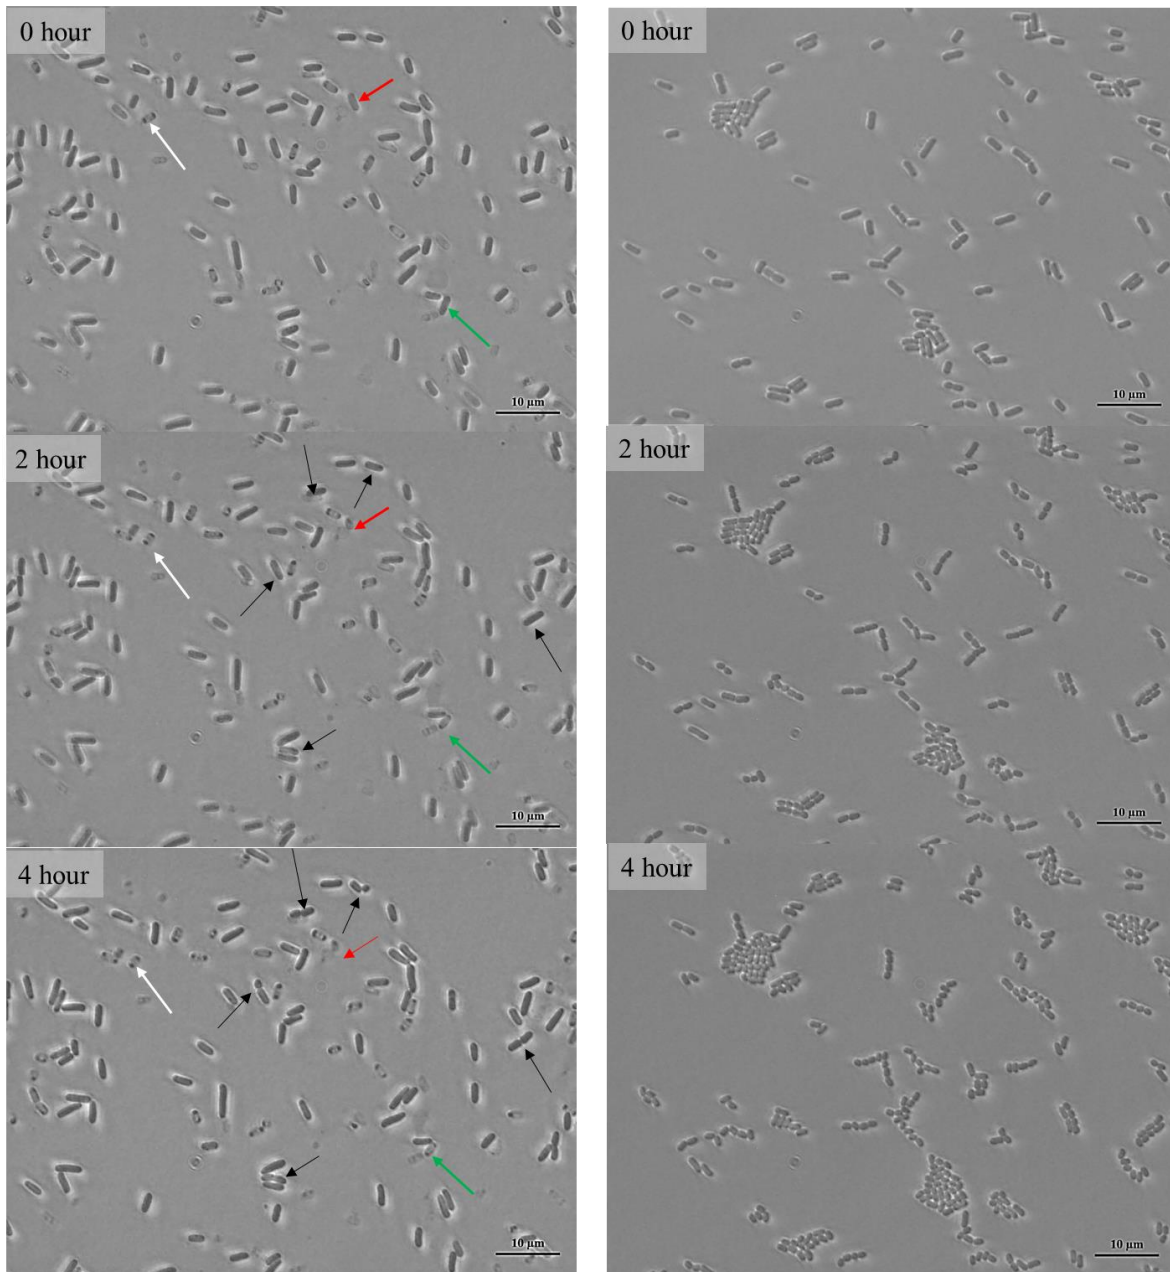

**Supplementary Figure 30. Stationary-phase cells revive differently than persister cells, Related to Figure 5 and Figure 6.** Persister cell waking (A) and revival of stationary-phase cells (turbidity 2.0 at 600 nm) (B) for the wild type strain on M9 0.4% glucose agar plates incubated at 37°C for 4 hours. For the stationary-phase cells,  $98 \pm 2\%$  of the cells begin growing immediately. For the persister cells, black arrows indicate all waking cells ( $7 \pm 2\%$ ), white arrows indicate representative ghost cells (cells with cytosolic components condensed at the poles), green arrows indicate representative cells that become ghost cells, and red arrows indicate representative cells that lyse (A). Scale bars indicate 10 μm. Representative results from two independent cultures are shown.

**Table S1. Single *E. coli* persister cell waking by Ala, Related to Figure 1.** Single persister cells were observed using light microscopy (Zeiss Axio Scope.A1). The total number of *E. coli* BW25113 persister cells that wake on M9 5X Ala, M9 5X Asn, and no amino acid (aa) gel pads is shown after 6 h at 37 °C. Also, growth of exponential cells on gel pads that lack amino acids is shown after 6 h at 37 °C. 5X Ala and 5X Asn is 375 µg/mL. Total waking cells indicates the number of dividing or elongating cells. These results are the combined observations from two independent experiments, and standard deviations are shown. The microscope images are shown in **Fig. 1**. A Student's t-test was used to compare Ala vs. Asn (\* indicates a p value < 0.05).

|                             | <b>Total cells</b> | <b>Dividing cells</b> | <b>Elongating cells</b> | <b>Total waking cells</b> | <b>% waking</b> | <b>Fold-change</b> |
|-----------------------------|--------------------|-----------------------|-------------------------|---------------------------|-----------------|--------------------|
| <b>Ala</b>                  | 51                 | 7                     | 2                       | 9                         | 18 ± 1          | 9*                 |
| <b>Asn</b>                  | 46                 | 1                     | 0                       | 1                         | 2 ± 2           | 1                  |
| <b>no aa</b>                | 56                 | 0                     | 0                       | 0                         | 0 ± 0           | -∞                 |
| <b>no aa (expon. cells)</b> | 104                | 12                    | 30                      | 12                        | 12 ± 4          | -                  |



**Table S2. Single persister cells wake primarily by sensing nutrients rather than spontaneously, Related to Figure 2.** Single persister cells were observed using light microscopy (Zeiss Axio Scope.A1). The total number of *E. coli* BW25113 wild type persister cells on the NaCl, NaCl + Amp, and NaCl + Amp + Ala agarose gel pads is shown after 6 h at 37 °C. Dead cells were identified by their disappearance. The concentration of NaCl was 0.85 %, Amp was 100 µg/mL, and Ala was 375 µg/mL. Fold-changes was based on NaCl + Amp. These results are the combined observations from two independent experiments, and standard deviations are shown. The microscope images are shown in **Fig. 2**. A Student's t-test was used to compare NaCl + Amp vs. NaCl + Amp + Ala (\*\* indicates a p value < 0.0003).

|                         | <b>Total cells</b> | <b>Dead cells</b> | <b>% of dead cells</b> | <b>Fold-change</b> |
|-------------------------|--------------------|-------------------|------------------------|--------------------|
| <b>NaCl</b>             | 144                | 0                 | 0 ± 0                  | -                  |
| <b>NaCl + Amp</b>       | 164                | 13                | 7.5 ± 0.7              | 1                  |
| <b>NaCl + Amp + Ala</b> | 135                | 47                | 33 ± 6                 | 4.4**              |

**Table S3. Single persister cells wake with alanine as a signal, Related to Figure 2.** Single persister cells were observed using light microscopy (Zeiss Axio Scope.A1). The total number and waking number of persister cells of BW25113  $\Delta dadA$  on M9 10X Ala, no nutrients, pyruvate (final conc. 0.24%) + 10 X Ala, and pyruvate (final conc. 0.24%) agarose gel pads are shown after 6 h at 37°C. These results are the combined observations from two independent experiments. The microscope images are shown in **Supplementary Figure 4**. Student's t-test was used to compare  $\Delta dadA$  + Ala and  $\Delta dadA$  (no nutrients) (\* indicates a p value < 0.05).

|                                | Total cells | Total waking cells | % waking  | Fold-change |
|--------------------------------|-------------|--------------------|-----------|-------------|
| $\Delta dadA$ + Ala            | 345         | 16                 | 4 ± 1     | 1           |
| $\Delta dadA$ (no nutrients)   | 223         | 0                  | 0 ± 0     | $-\infty$ * |
| $\Delta dadA$ + pyruvate + Ala | 303         | 14                 | 4.5 ± 0.5 | 1.1         |
| $\Delta dadA$ + pyruvate       | 327         | 3                  | 0.7 ± 1.1 | -5.7        |

**Table S4. Enhanced single persister cell waking on Ala via proteins identified by the ASKA library search, Related to Figure 3.** Single persister cells were observed using light microscopy (Zeiss Axio Scope.A1). The total number and waking number of persister cells of BW25113 producing the indicated proteins (PsiF, PanD, YmgF, YjcF, PptA, and CheY) are shown. Fold-change in waking is relative to BW25113 with the empty plasmid pCA24N. These results are the combined observations from two independent experiments after 18 hours, and standard deviations are shown. The microscope images are shown in **Supplementary Figure 6-8**. Student's t-tests were used to compare Empty and the other groups (\*\* indicates a p value < 0.01).

|              | <b>Total cells</b> | <b>Waking cells</b> | <b>% waking</b> | <b>Fold-change</b> |
|--------------|--------------------|---------------------|-----------------|--------------------|
| <b>Empty</b> | 103                | 2                   | 3 ± 5           | 1                  |
| <b>PsiF</b>  | 91                 | 10                  | 11 ± 3          | 6.1                |
| <b>PanD</b>  | 105                | 43                  | 40 ± 30         | 22.8               |
| <b>YmgF</b>  | 87                 | 28                  | 30 ± 10         | 17.9               |
| <b>YjcF</b>  | 120                | 14                  | 11.7 ± 0.3      | 6.5                |
| <b>PptA</b>  | 118                | 15                  | 8 ± 6           | 7.1                |
| <b>CheY</b>  | 93                 | 93                  | 100 ± 0         | 33**               |

**Table S5. Single persister cell waking on Ala after producing chemotaxis-related, cAMP-related, and ribosome-resuscitation-related proteins, Related to Figure 3.** Single persister cells were observed using light microscopy (Zeiss Axio Scope.A1). The total number and waking number of persister cells are shown. Fold-change in waking is relative to BW25113 with the empty plasmid pCA24N (empty vector data from **Table S4**). IPTG was used only for producing CpdA as indicated, otherwise, protein production was from the leaky promoter. M9 5X Ala with 3 mM atropine in the agarose gel pad was used with cells producing CpdA. These results are the combined observations from two independent experiments after 18 hours, and standard deviations are shown. The microscope images are shown in **Fig. 3, Supplemental Fig. 9, 16**. Student's t-tests were used to compare Empty and the other groups (\* indicates a p value < 0.05 and \*\* indicates a p value < 0.01).

|                             | <b>Total cells</b> | <b>Waking cells</b> | <b>% waking</b> | <b>Fold-change</b> |
|-----------------------------|--------------------|---------------------|-----------------|--------------------|
| <b>Empty</b>                | 103                | 2                   | 3 ± 5           | 1                  |
| <b>CheA</b>                 | 93                 | 77                  | 82 ± 2          | 27**               |
| <b>CheY</b>                 | 93                 | 93                  | 100 ± 0         | 33**               |
| <b>Tar</b>                  | 123                | 33                  | 28 ± 7          | 9                  |
| <b>Trg</b>                  | 97                 | 23                  | 24 ± 7          | 8                  |
| <b>Tsr</b>                  | 144                | 4                   | 2.78 ± 0.05     | -1.1               |
| <b>CpdA</b>                 | 128                | 21                  | 25 ± 24         | 8                  |
| <b>CpdA (0.5 mM IPTG)</b>   | 115                | 52                  | 45 ± 1          | 15**               |
| <b>CpdA + 3 mM atropine</b> | 77                 | 71                  | 92 ± 3          | 31**               |
| <b>CyaA</b>                 | 137                | 3                   | 2.1 ± 0.5       | -1.4               |
| <b>FliN</b>                 | 142                | 18                  | 13 ± 2          | 4                  |
| <b>HflX</b>                 | 126                | 25                  | 20.0 ± 0.7      | 7*                 |

**Table S6. Persister cell formation on LB, Related to Figure 3.** The percentage of persistence for single-gene knockouts (relative to BW25113 wild-type cells) and for BW25113 cells harboring pCA24N (relative to BW25113/pCA24N) was quantified for each strain by growing cells to the exponential phase in LB (turbidity of 0.8 at 600 nm), by treating with rifampicin and ampicillin to form persisters and to remove non-persisters, and by counting the number of colonies on LB plates after 1 day (the number of colonies indicates the number of cells that survive antibiotic treatment at 10X MIC). The specific growth rates (1/h) in LB are relative to BW25113 wild-type cells ( $0.81 \pm 0.01$ ) for the single-gene knockouts and relative to BW25113/pCA24N ( $0.92 \pm 0.06$ ) for cells producing the indicated protein; these specific growth rates were calculated by measuring the change in turbidity during exponential growth for two replicates for each independent culture in 96-well plates at 37°C. The results are the combined observations from two independent experiments, and standard deviations are shown.

|                  | <b>% persister formation</b> | <b>% growth rate</b> |
|------------------|------------------------------|----------------------|
| <b>Wild type</b> | 100.0 ± 0.1                  | 100 ± 1              |
| <i>ΔarfB</i>     | 98.9 ± 0.9                   | 98 ± 43              |
| <i>ΔcheA</i>     | 99 ± 1                       | 110 ± 31             |
| <i>ΔcheY</i>     | 101.6 ± 0.1                  | 120 ± 10             |
| <i>ΔcpdA</i>     | 100.8 ± 0.3                  | 98 ± 4               |
| <i>Δcrp</i>      | 102 ± 1                      | 96 ± 6               |
| <i>ΔcyaA</i>     | 93.9 ± 2.4                   | 109 ± 4              |
| <i>ΔdadA</i>     | 97 ± 4                       | 104 ± 8              |
| <i>ΔflgE</i>     | 101.2 ± 0.6                  | 129 ± 20             |
| <i>ΔflhD</i>     | 101.1 ± 0.2                  | 112 ± 1              |
| <i>ΔfliN</i>     | 98.1 ± 0.8                   | 108 ± 11             |
| <i>ΔhflX</i>     | 100.4 ± 0.2                  | 118 ± 4              |
| <i>ΔmotB</i>     | 100.7 ± 0.4                  | 104 ± 6              |
| <i>ΔmotA</i>     | 99.1 ± 0.2                   | 110 ± 17             |
| <i>ΔssrA'</i>    | 101 ± 2                      | 99 ± 8               |
| <i>Δtar</i>      | 98.3 ± 0.1                   | 97 ± 6               |
| <i>Δtrg</i>      | 98.7 ± 0.4                   | 86 ± 4               |
| <i>ΔptsG</i>     | 97 ± 2                       | 86 ± 4               |
| <i>Δcrr</i>      | 97 ± 1                       | 113 ± 4              |
| <i>ΔmglB</i>     | 98 ± 2                       | 111 ± 2              |
| <i>ΔmalE</i>     | 100.8 ± 0.4                  | 111 ± 4              |
| <i>ΔsmpB</i>     | 96 ± 2                       | 121 ± 63             |
| <b>pCA24N</b>    | 100.0 ± 0.5                  | 100 ± 6              |
| <b>ArfB</b>      | 97.4 ± 0.7                   | 86 ± 7               |
| <b>CheA</b>      | 95.6 ± 0.6                   | 73 ± 6               |
| <b>CheY</b>      | 99.6 ± 0.5                   | 80 ± 8               |
| <b>CpdA</b>      | 99.7 ± 0.5                   | 114 ± 8              |
| <b>Crp</b>       | 98.2 ± 0.7                   | 82.0 ± 6             |
| <b>CyaA</b>      | 99.7 ± 0.7                   | 103 ± 11             |
| <b>FlhD</b>      | 98.0 ± 0.7                   | 107 ± 8              |
| <b>FliN</b>      | 97.6 ± 0.6                   | 94 ± 13              |

|             |                |            |
|-------------|----------------|------------|
| <b>HflX</b> | $97.7 \pm 0.9$ | $79 \pm 6$ |
| <b>Tar</b>  | $98.8 \pm 0.8$ | $77 \pm 7$ |
| <b>Trg</b>  | $97.9 \pm 0.7$ | $77 \pm 6$ |
| <b>PtsG</b> | $97 \pm 1$     | $81 \pm 7$ |
| <b>Crr</b>  | $93.6 \pm 0.2$ | $81 \pm 6$ |

---



**Table S7. Single persister cell waking on Ala after inactivating flagellar proteins MotB, FliD, and FliN, Related to Figure 3.** Single persister cells were observed using light microscopy (Zeiss Axio Scope.A1). The total number and waking number of persister cells are shown. Fold-change in waking is relative to wild-type BW25113 (wild-type data from **Table S1**). These results are the combined observations from two independent experiments after 6 hours, and standard deviations are shown. The microscope images are shown in **Supplementary Figure 14**. Student's t-tests were used to compare wild type and the other groups (\* indicates a p value < 0.05 and \*\* indicates a p value < 0.01).

|                  | <b>Total cells</b> | <b>Waking cells</b> | <b>% waking</b> | <b>Fold-change</b> |
|------------------|--------------------|---------------------|-----------------|--------------------|
| <b>Wild type</b> | 51                 | 9                   | 18 ± 1          | 1                  |
| <i>ΔmotB</i>     | 57                 | 17                  | 30 ± 10         | 1.7                |
| <i>ΔfliD</i>     | 81                 | 5                   | 6.1 ± 0.4       | -3**               |
| <i>ΔfliN</i>     | 96                 | 5                   | 5 ± 2           | -3.6*              |

**Table S8. Single persister cell waking on Ala after inactivating CpdA and CyaA, Related to Figure 3.** Single persister cells were observed using light microscopy (Zeiss Axio Scope.A1). The total number and waking number of persister cells are shown. Fold-change in waking is relative to wild-type BW25113 (wild-type data from **Table S1**). These results are the combined observations from two independent experiments after 6 hours, and standard deviations are shown. The microscope images are shown in **Supplementary Figure 18**. Student's t-tests were used to compare wild type and the other groups (\*\* indicates a p value < 0.01).

|                  | <b>Total cells</b> | <b>Waking cells</b> | <b>% waking</b> | <b>Fold-change</b> |
|------------------|--------------------|---------------------|-----------------|--------------------|
| <b>Wild type</b> | 51                 | 9                   | 18 ± 1          | 1                  |
| <i>ΔcpdA</i>     | 79                 | 0                   | 0 ± 0           | -∞**               |
| <i>ΔcyaA</i>     | 93                 | 68                  | 74 ± 8          | 4.1**              |

**Table S9. Single persister cell waking on Ala after inactivating ribosome rescue proteins HflX and ArfB and inactivating trans-translation (SsrA), Related to Figure 3.** Single persister cells were observed using light microscopy (Zeiss Axio Scope.A1). The total number and waking number of persister cells are shown. Fold-change in waking is relative to wild-type BW25113 (wild-type data from **Table S1**). These results are the combined observations from two independent experiments after 6 hours, and standard deviations are shown. The microscope images are shown in **Supplementary Figure 21**. Student's t-tests were used to compare wild type and the other groups (\*\* indicates a p value < 0.01).

|                  | <b>Total cells</b> | <b>Waking cells</b> | <b>% waking</b> | <b>Fold-change</b> |
|------------------|--------------------|---------------------|-----------------|--------------------|
| <b>Wild type</b> | 51                 | 9                   | 18 ± 1          | 1                  |
| <i>ΔhflX</i>     | 96                 | 0                   | 0 ± 0           | -∞**               |
| <i>ΔarfB</i>     | 101                | 15                  | 15 ± 2          | -1.2               |
| <i>ΔssrA</i>     | 123                | 1                   | 0.8 ± 1.1       | -22.5**            |

**Table S10. Single persister cell waking on glucose or alanine gel pads, Related to Figure 4.** Single wild-type persister cells were observed using light microscopy (Zeiss Axio Scope.A1). The total number and waking number of persister cells on minimal medium with 0.4% glucose and 0.04% alanine are shown (0.4% glucose inhibited resuscitation with Ala). Fold-change in waking is relative to alanine (wild-type Ala data from **Table S1**). These results are the combined observations from two independent experiments after 6 hours, and standard deviations are shown. The microscope images are shown in **Figure 4**. Student's t-test was used to compare glucose vs. alanine (\*\* indicates a p value < 0.01).

|                     | <b>Glucose</b> | <b>Alanine</b> |
|---------------------|----------------|----------------|
| <b>Total cells</b>  | 354            | 51             |
| <b>Waking cells</b> | 326            | 9              |
| <b>Waking %</b>     | 92 ± 2         | 18 ± 1         |
| <b>Fold-change</b>  | 5.1**          | 1              |

**Table S11. Single persister cell waking on glucose gel pads, Related to Figure 5.** Single persister cells were observed using light microscopy (Zeiss Axio Scope.A1). The total number and waking number of persister cells are shown. Fold-change in waking is relative to wild-type BW25113 (same field of view with 354 cells as in **Table S10** but cells wake here for only 3 h vs. 6 h in **Table S10**). These results are the combined observations from two independent experiments after 3 hours, and standard deviations are shown. The microscope images are shown in **Figure 5, Supplementary Fig. 27**. Student's t-tests were used to compare wild type and the other groups (\* indicates a p value < 0.05 and \*\* indicates a p value < 0.01).

|                  | <b>Total cells</b> | <b>Waking cells</b> | <b>% waking</b> | <b>Fold-change</b> |
|------------------|--------------------|---------------------|-----------------|--------------------|
| <b>wild type</b> | 354                | 74                  | 22 ± 3          | 1                  |
| <i>Δtrg</i>      | 283                | 12                  | 5 ± 1           | -4.6*              |
| <i>ΔptsG</i>     | 212                | 1                   | 0.3 ± 0.5       | -69.2*             |
| <i>Δcrr</i>      | 369                | 44                  | 11±3            | -2                 |
| <i>ΔmglB</i>     | 311                | 55                  | 17.8 ± 0.5      | -1.2               |
| <i>ΔmalE</i>     | 329                | 77                  | 23.3 ± 0.5      | 1.1                |
| <i>ΔcpdA</i>     | 305                | 20                  | 6 ± 2           | -3.7*              |
| <i>ΔcyaA</i>     | 279                | 139                 | 50 ± 2          | 2.3**              |
| <i>Δhfq</i>      | 201                | 23                  | 12 ± 1          | -1.9               |
| <i>ΔsmpB</i>     | 352                | 132                 | 35 ± 5          | 1.6                |
| <i>ΔssrA</i>     | 316                | 22                  | 6.9 ± 0.1       | -3.2*              |

**Table S12. Single persister cell waking on glucose gel pads, Related to Figure 6.** Single persister cells were observed using light microscopy (Zeiss Axio Scope.A1). The total number and waking number of persister cells are shown. Fold-change in waking is relative to BW25113 with the empty plasmid pCA24N. These results are the combined observations from two independent experiments after 5 hours, and standard deviations are shown. The microscope images are shown in **Figure 6, Supplementary Fig. 26**. Student's t-tests were used to compare Empty and the other groups (\* indicates a p value < 0.05 and \*\* indicates a p value < 0.01).

|              | <b>Total cells</b> | <b>Waking cells</b> | <b>% waking</b> | <b>Fold-change</b> |
|--------------|--------------------|---------------------|-----------------|--------------------|
| <b>Empty</b> | 284                | 7                   | 2.5 ± 0.3       | 1                  |
| <b>PtsG</b>  | 195                | 0                   | 0 ± 0           | -∞*                |
| <b>Crr</b>   | 356                | 5                   | 1.4 ± 0.2       | -1.8               |
| <b>CheY</b>  | 339                | 129                 | 39 ± 4          | 15.9**             |
| <b>CpdA</b>  | 269                | 104                 | 39 ± 1          | 15.9**             |
| <b>HflX</b>  | 321                | 11                  | 3.41 ± 0.07     | 1.4                |
| <b>Hfq</b>   | 207                | 11                  | 5.0 ± 0.9       | 2                  |



**Table S13.** Bacterial strains and plasmids used in this study, **Related to Figures 1, 2, 3, 4, 5, and 6.**

| Strains and Plasmids                   | Features                                                                                    | Source                  |
|----------------------------------------|---------------------------------------------------------------------------------------------|-------------------------|
| <i>E. coli</i> BW25113                 | <i>rrnB3 ΔlacZ4787 hsdR514 Δ(araBAD)567 Δ(rhaBAD)568 rph-1</i>                              | (Baba et al., 2006)     |
| <i>E. coli</i> BW25113 $\Delta arfB$   | $\Delta arfB$ , Km <sup>R</sup>                                                             | (Baba et al., 2006)     |
| <i>E. coli</i> BW25113 $\Delta cheA$   | $\Delta cheA$ , Km <sup>R</sup>                                                             | (Baba et al., 2006)     |
| <i>E. coli</i> BW25113 $\Delta cheY$   | $\Delta cheY$ , Km <sup>R</sup>                                                             | (Baba et al., 2006)     |
| <i>E. coli</i> BW25113 $\Delta cpdA$   | $\Delta cpdA$ , Km <sup>R</sup>                                                             | (Baba et al., 2006)     |
| <i>E. coli</i> BW25113 $\Delta crp$    | $\Delta crp$ , Km <sup>R</sup>                                                              | (Baba et al., 2006)     |
| <i>E. coli</i> BW25113 $\Delta cyaA$   | $\Delta cyaA$ , Km <sup>R</sup>                                                             | (Baba et al., 2006)     |
| <i>E. coli</i> BW25113 $\Delta dadA$   | $\Delta dadA$ , Km <sup>R</sup>                                                             | (Baba et al., 2006)     |
| <i>E. coli</i> BW25113 $\Delta flgE$   | $\Delta flgE$ , Km <sup>R</sup>                                                             | (Baba et al., 2006)     |
| <i>E. coli</i> BW25113 $\Delta flhD$   | $\Delta flhD$ , Km <sup>R</sup>                                                             | (Baba et al., 2006)     |
| <i>E. coli</i> BW25113 $\Delta fliN$   | $\Delta fliN$ , Km <sup>R</sup>                                                             | (Baba et al., 2006)     |
| <i>E. coli</i> BW25113 $\Delta hflX$   | $\Delta hflX$ , Km <sup>R</sup>                                                             | (Baba et al., 2006)     |
| <i>E. coli</i> BW25113 $\Delta motA$   | $\Delta motA$ , Km <sup>R</sup>                                                             | (Baba et al., 2006)     |
| <i>E. coli</i> BW25113 $\Delta motB$   | $\Delta motB$ , Km <sup>R</sup>                                                             | (Baba et al., 2006)     |
| <i>E. coli</i> BW25113 $\Delta ssrA$ ' | $\Delta ssrA$ , Km <sup>R</sup> (161 of 363 nt deleted with attL intact)                    | (Wang et al., 2009)     |
| <i>E. coli</i> BW25113 $\Delta tar$    | $\Delta tar$ , Km <sup>R</sup>                                                              | (Baba et al., 2006)     |
| <i>E. coli</i> BW25113 $\Delta trg$    | $\Delta trg$ , Km <sup>R</sup>                                                              | (Baba et al., 2006)     |
| <i>E. coli</i> BW25113 $\Delta arfB$   | $\Delta arfB$ , Km <sup>R</sup>                                                             | (Baba et al., 2006)     |
| <i>E. coli</i> BW25113 $\Delta ptsG$   | $\Delta ptsG$ , Km <sup>R</sup>                                                             | (Baba et al., 2006)     |
| <i>E. coli</i> BW25113 $\Delta mglB$   | $\Delta mglB$ , Km <sup>R</sup>                                                             | (Baba et al., 2006)     |
| <i>E. coli</i> BW25113 $\Delta malE$   | $\Delta malE$ , Km <sup>R</sup>                                                             | (Baba et al., 2006)     |
| <i>E. coli</i> BW25113 $\Delta smpB$   | $\Delta smpB$ , Km <sup>R</sup>                                                             | (Baba et al., 2006)     |
| <i>E. coli</i> MG1655-ASV              | <i>rrnBP1::GFP[ASV]</i>                                                                     | (Shah et al., 2006)     |
| <i>P. aeruginosa</i> PA14              | Wild type                                                                                   | (Liberati et al., 2006) |
| <b>Plasmids</b>                        |                                                                                             |                         |
| pCA24N                                 | Cm <sup>R</sup> ; <i>lacI<sup>q</sup></i>                                                   | (Kitagawa et al., 2005) |
| pCA24N_ aer                            | Cm <sup>R</sup> ; <i>lacI<sup>q</sup></i> , P <sub>T5-lac</sub> :: <i>aer</i> <sup>+</sup>  | (Kitagawa et al., 2005) |
| pCA24N_ arfB                           | Cm <sup>R</sup> ; <i>lacI<sup>q</sup></i> , P <sub>T5-lac</sub> :: <i>arfB</i> <sup>+</sup> | (Kitagawa et al., 2005) |
| pCA24N_ cheA                           | Cm <sup>R</sup> ; <i>lacI<sup>q</sup></i> , P <sub>T5-lac</sub> :: <i>cheA</i> <sup>+</sup> | (Kitagawa et al., 2005) |
| pCA24N_ cheY                           | Cm <sup>R</sup> ; <i>lacI<sup>q</sup></i> , P <sub>T5-lac</sub> :: <i>cheY</i> <sup>+</sup> | (Kitagawa et al., 2005) |
| pCA24N_ cpdA                           | Cm <sup>R</sup> ; <i>lacI<sup>q</sup></i> , P <sub>T5-lac</sub> :: <i>cpdA</i> <sup>+</sup> | (Kitagawa et al., 2005) |
| pCA24N_ crp                            | Cm <sup>R</sup> ; <i>lacI<sup>q</sup></i> , P <sub>T5-lac</sub> :: <i>crp</i> <sup>+</sup>  | (Kitagawa et al., 2005) |
| pCA24N_ cyaA                           | Cm <sup>R</sup> ; <i>lacI<sup>q</sup></i> , P <sub>T5-lac</sub> :: <i>cyaA</i> <sup>+</sup> | (Kitagawa et al., 2005) |
| pCA24N_ flhD                           | Cm <sup>R</sup> ; <i>lacI<sup>q</sup></i> , P <sub>T5-lac</sub> :: <i>flhD</i> <sup>+</sup> | (Kitagawa et al., 2005) |
| pCA24N_ fliN                           | Cm <sup>R</sup> ; <i>lacI<sup>q</sup></i> , P <sub>T5-lac</sub> :: <i>fliN</i> <sup>+</sup> | (Kitagawa et al., 2005) |
| pCA24N_ hflX                           | Cm <sup>R</sup> ; <i>lacI<sup>q</sup></i> , P <sub>T5-lac</sub> :: <i>hflX</i> <sup>+</sup> | (Kitagawa et al., 2005) |
| pCA24N_ panD                           | Cm <sup>R</sup> ; <i>lacI<sup>q</sup></i> , P <sub>T5-lac</sub> :: <i>panD</i> <sup>+</sup> | (Kitagawa et al., 2005) |
| pCA24N_ pptA                           | Cm <sup>R</sup> ; <i>lacI<sup>q</sup></i> , P <sub>T5-lac</sub> :: <i>pptA</i> <sup>+</sup> | (Kitagawa et al., 2005) |
| pCA24N_ psiF                           | Cm <sup>R</sup> ; <i>lacI<sup>q</sup></i> , P <sub>T5-lac</sub> :: <i>psiF</i> <sup>+</sup> | (Kitagawa et al., 2005) |
| pCA24N_ tap                            | Cm <sup>R</sup> ; <i>lacI<sup>q</sup></i> , P <sub>T5-lac</sub> :: <i>tap</i> <sup>+</sup>  | (Kitagawa et al., 2005) |
| pCA24N_ tar                            | Cm <sup>R</sup> ; <i>lacI<sup>q</sup></i> , P <sub>T5-lac</sub> :: <i>tar</i> <sup>+</sup>  | (Kitagawa et al., 2005) |
| pCA24N_ trg                            | Cm <sup>R</sup> ; <i>lacI<sup>q</sup></i> , P <sub>T5-lac</sub> :: <i>trg</i> <sup>+</sup>  | (Kitagawa et al., 2005) |
| pCA24N_ tsr                            | Cm <sup>R</sup> ; <i>lacI<sup>q</sup></i> , P <sub>T5-lac</sub> :: <i>tsr</i> <sup>+</sup>  | (Kitagawa et al., 2005) |
| pCA24N_ yjcF                           | Cm <sup>R</sup> ; <i>lacI<sup>q</sup></i> , P <sub>T5-lac</sub> :: <i>yjcF</i> <sup>+</sup> | (Kitagawa et al., 2005) |

|             |                                                                                             |                         |
|-------------|---------------------------------------------------------------------------------------------|-------------------------|
| pCA24N_ymgF | Cm <sup>R</sup> ; <i>lacI<sup>q</sup></i> , P <sub>T5-lac</sub> :: <i>ymgF</i> <sup>+</sup> | (Kitagawa et al., 2005) |
| pCA24N_ptsG | Cm <sup>R</sup> ; <i>lacI<sup>q</sup></i> , P <sub>T5-lac</sub> :: <i>ptsG</i> <sup>+</sup> | (Kitagawa et al., 2005) |
| pCA24N_crr  | Cm <sup>R</sup> ; <i>lacI<sup>q</sup></i> , P <sub>T5-lac</sub> :: <i>crr</i> <sup>+</sup>  | (Kitagawa et al., 2005) |

---

Km<sup>R</sup> and Cm<sup>R</sup> indicate kanamycin and chloramphenicol resistance, respectively.

**Table S14.** Supplementation levels (1X) for amino acids in M9 minimal medium, **Related to Figure 1.**

| <b>No.</b> | <b>Amino acid</b>   | <b>Final concentration<br/>(<math>\mu\text{g/mL}</math>)</b> |
|------------|---------------------|--------------------------------------------------------------|
| 1          | 1 % L-alanine       | 75                                                           |
| 2          | 2 % L-arginine      | 145                                                          |
| 3          | 1 % L-asparagine    | 75                                                           |
| 4          | 1 % L aspartic acid | 75                                                           |
| 5          | 2 % L-cysteine      | 50                                                           |
| 6          | 2 % L-histidine     | 42                                                           |
| 7          | 1 % L-glutamic acid | 75                                                           |
| 8          | 1 % L-glutamine     | 75                                                           |
| 9          | 2 % glycine         | 110                                                          |
| 10         | 1 % L-isoleucine    | 42                                                           |
| 11         | 1 % L-leucine       | 41                                                           |
| 12         | 1 % L-lysine        | 75                                                           |
| 13         | 2 % L-methionine    | 25                                                           |
| 14         | 1 % L-phenylalanine | 75                                                           |
| 15         | 4 % L-proline       | 164                                                          |
| 16         | 2 % L-serine        | 42                                                           |
| 17         | 2 % L-threonine     | 82                                                           |
| 18         | 0.25 % L-tryptophan | 18                                                           |
| 19         | 1 % L-tyrosine      | 75                                                           |
| 20         | 1 % L-valine        | 42                                                           |

## TRANSPARENT METHODS

**Bacterial strain and growth conditions.** The bacterial strains and plasmids used in this study are listed in **Table S13**. *E. coli* BW25113 and its isogenic mutants (Baba et al., 2006), and the pCA24N-based plasmids from the *E. coli* ASKA collection (Kitagawa et al., 2005) were used. Lysogeny broth (Sambrook et al., 1989) was used for routine cell growth, and M9 medium supplemented with amino acids (Rodriguez and Tait, 1983) was used for waking studies; strains were grown at 37 °C. Each of the 20 amino acids stock solutions were prepared as indicated in **Table S14** (Rodriguez and Tait, 1983).

**Observation of persister cells on agarose gel pads.** We utilized our previous method for converting up to 70% of the cell population into persister cells (Kim et al., 2018a; Kim et al., 2018b; Kwan et al., 2013): exponentially-growing cells (turbidity of 0.8 at 600 nm) were treated with rifampicin (100 µg/mL for 30 min) to form persister cells by stopping transcription and non-persister cells were removed by lysis via ampicillin treatment (100 µg/mL for 3 h, 10X minimum inhibitory concentration (Kwan et al., 2013)). Cells were harvested at 17,000 g for 1 min and washed with 1x phosphate buffered saline buffer (Dulbecco and Vogt, 1954) (PBS) buffer twice to remove all possible carbon sources, then re-suspended with 1 mL of 1x PBS. To obtain biofilm persister cells, *E. coli* BW25113/pCA24N and *E. coli* MG1655-ASVGFP were cultured for 48 h at 37°C in the 96 well plates with LB; the biofilm formation was confirmed by crystal violet staining (Fletcher, 1977). The biofilm was washed two times with PBS to remove the planktonic cells, and the biofilm cells were removed by sonicating it for 5 sec at 30% power (Sonic Dismembrator 60, Fisher Scientific). The biofilm cells were resuspended in LB containing ampicillin (100 µg/mL) for 3 h to remove any non-persister cells. Gel pads of 1.5% agarose were prepared (Kim et al., 2018b) and 5 µL of persister cells were added, kept at 37°C, and observed using a light microscope (Zeiss Axio Scope.A1, bl\_ph channel at 1000 ms exposure) every hour. The fluorescence intensity of the ribosome GFP reporter strain, MG1655-ASVGFP, was monitored using a fluorescence microscope (Zeiss Axioscope.A1, GFP channel at 10,000 ms exposure) (Kim et al., 2018b).

**Observation of persister cells on motility gel pads.** An M9-gradient glucose motility gel pad (0.3% agar) was prepared by solidifying for 1.5 hours and adding 10 µL of 5 wt% glucose and 10 µL of persister cells.

The movement of the persister cell was observed using light microscopy (Zeiss Axio Scope.A1, bl\_ph channel at 1000 ms exposure).

**Persister resuscitation screen.** All 4,267 ASKA clones (GFP-) (Kitagawa et al., 2005) were combined, grown to a turbidity of 2 at 600 nm in LB medium, and their plasmids isolated using a plasmid DNA Mini Kit I (OMEGA Bio-tek, Norcross, GA, USA). The pooled ASKA plasmids (1  $\mu$ L containing 30 ng of DNA) was electroporated into 50  $\mu$ L of *E. coli* BW25113 competent cells, 1 mL LB medium was added, and the cells were grown to a turbidity of 0.5 in LB medium. Chloramphenicol was added (final conc. 30  $\mu$ g/mL) to the culture, and the cells were incubated at 250 rpm to a turbidity of 0.8. Rifampicin followed by ampicillin was added to make persister cells, the persister cells were washed twice with 1x PBS buffer, diluted 100-fold 1x PBS buffer, and 100  $\mu$ L was plated on M9 5X Ala (Cm) agar plates and incubated at 37°C; faster colony appearance indicated faster persister resuscitation.

#### ACKNOWLEDGEMENTS

This work was supported by funds derived from the Biotechnology Endowed Professorship at the Pennsylvania State University. We thank Prof. John Parkinson and Prof. Pushkar Lele and for fruitful discussions about chemotaxis.

#### SUPPLEMENTAL REFERENCES

- Baba, T., Ara, T., Hasegawa, M., Takai, Y., Okumura, Y., Baba, M., Datsenko, K.A., Tomita, M., Wanner, B.L., and Mori, H. (2006). Construction of *Escherichia coli* K-12 in-frame, single-gene knockout mutants: the Keio collection. *Mol Syst Biol* 2, 2006 0008.
- Dulbecco, R., and Vogt, M. (1954). Plaque formation and isolation of pure lines with poliomyelitis viruses. *J Exp Med* 99, 167-182.
- Fletcher, M. (1977). The effects of culture concentration and age, time, and temperature on bacterial attachment to polystyrene. *Canadian journal of microbiology* 23, 1-6.
- Kim, J.-S., Chowdhury, N., Yamasaki, R., and Wood, T.K. (2018a). Viable But Non-Culturable and Persistence Describe the Same Bacterial Stress State. *Environ Microbiol* 20, 2038-2048.
- Kim, J.-S., Yamasaki, R., Song, S., Zhang, W., and Wood, T.K. (2018b). Single cell observations show persister cells wake based on ribosome content. *Environ Microbiol* 20, 2085-2098.
- Kitagawa, M., Ara, T., Arifuzzaman, M., Ioka-Nakamichi, T., Inamoto, E., Toyonaga, H., and Mori, H. (2005). Complete set of ORF clones of *Escherichia coli* ASKA library (a complete set of *E. coli* K-12 ORF archive): unique resources for biological research. *DNA Res* 12, 291-299.
- Kwan, B.W., Valenta, J.A., Benedik, M.J., and Wood, T.K. (2013). Arrested protein synthesis increases persister-like cell formation. *Antimicrob Agents Chemother* 57, 1468-1473.

- Liberati, N.T., Urbach, J.M., Miyata, S., Lee, D.G., Drenkard, E., Wu, G., Villanueva, J., Wei, T., and Ausubel, F.M. (2006). An ordered, nonredundant library of *Pseudomonas aeruginosa* strain PA14 transposon insertion mutants. *Proc Natl Acad Sci U S A* *103*, 2833-2838.
- Rodriguez, R.L., and Tait, R.C. (1983). *Recombinant DNA Techniques: An Introduction* (Menlo Park, CA: Benjamin/Cummings Publishing).
- Sambrook, J., Fritsch, E.F., and Maniatis, T. (1989). *Molecular cloning: a laboratory manual* (Cold spring harbor laboratory press).
- Shah, D., Zhang, Z., Khodursky, A., Kaldalu, N., Kurg, K., and Lewis, K. (2006). Persisters: a distinct physiological state of *E. coli*. *Bmc Microbiol* *6*, 53.
- Wang, X., Kim, Y., and Wood, T.K. (2009). Control and Benefits of CP4-57 Prophage Excision in *Escherichia coli* Biofilms. *ISME J* *3*, 1164-1179.
